# Supplementary material
Source: PubMed Central journal article supplement (PMC4524557)

# **Small lipopeptides possess anti-biofilm capability comparable to daptomycin and vancomycin**

Biswajit Mishra, Tamara Lushnikova, and Guangshun Wang\*

*Department of Pathology and Microbiology, University of Nebraska Medical Center, 986495  
Nebraska Medical Center, Omaha, NE 68198-6495, USA*

Supporting information:

Table S1;

Table S2

Fig. S1;

Fig. S2.

\*Corresponding author. Mailing address:

Guangshun Wang, Ph.D.

Department of Pathology and Microbiology

University of Nebraska Medical Center

986495 Nebraska Medical Center

Omaha, NE 68198-6495

USA

**Phone:** (402) 559-4176;

**Fax:** (402) 559-4077;

**E-mail:** gwang@unmc.edu

**Table S1.** Minimal inhibitory concentration (MIC) of selected lipopeptides against fungi

| Peptide name | MIC ( $\mu\text{M}$ ) |                    |                      |
|--------------|-----------------------|--------------------|----------------------|
|              | <i>C. albicans</i>    | <i>C. glabrata</i> | <i>C. tropicalis</i> |
| C14-KK       | >25                   | 25                 | 6.25                 |
| C14-RRR      | >25                   | 25                 | 6.25                 |
| C14-LK       | 6.25                  | 1.5                | 1.56                 |
| C14-RW       | >25                   | >25                | >25                  |
| C14-WR       | >25                   | 25-50              | 12.5-25              |
| C14-WWK      | >25                   | >25                | >25                  |
| C14-KWI      | >25                   | >25                | >25                  |
| C14-LKK      | >25                   | 6.25               | 1.56                 |
| C14-EE*      | >25                   | >25                | >25                  |
| C14-LE*      | >25                   | >25                | >25                  |
| C14-WE*      | >25                   | >25                | >25                  |
| C14-EW*      | >25                   | >25                | >25                  |

\*The antifungal assay of these anionic peptides was done in the presence or absence of 2 mM  $\text{Ca}^{2+}$

**Table S2.** Influence of acyl chain length on the antimicrobial activity of lipopeptides against bacteria

| Peptide name | Purity | MIC ( $\mu\text{M}$ )      |                              |                    |                    |
|--------------|--------|----------------------------|------------------------------|--------------------|--------------------|
|              |        | <i>S. aureus</i><br>USA300 | <i>P. aeruginosa</i><br>PAO1 | <i>E. coli</i> K12 | <i>B. subtilis</i> |
| C14-KK       | 97.44% | 6.25                       | 50                           | $\leq 6.25$        | $\leq 6.25$        |
| C12-KK       | 95.82% | 100                        | $> 200$                      | 100                | 100                |
| C10-KK       | 96.43% | $> 200$                    | $> 200$                      | $> 200$            | $> 200$            |
| C8-KK        | 98.19% | $> 200$                    | $> 200$                      | $> 200$            | $> 200$            |
| C6-KK        | 98.44% | $> 200$                    | $> 200$                      | $> 200$            | $> 200$            |

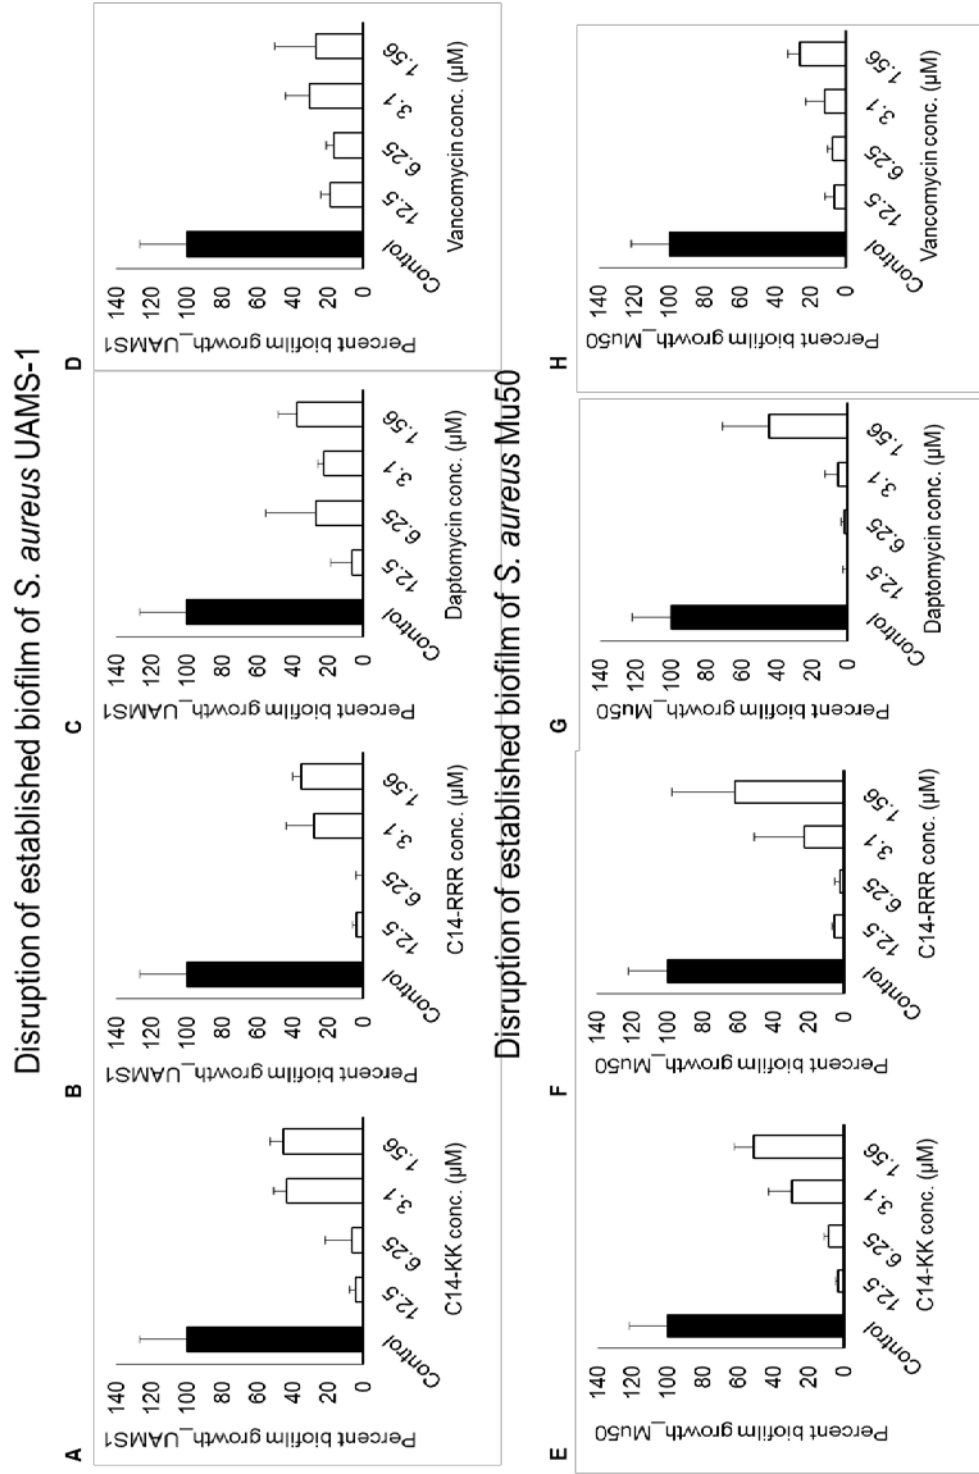

**Figure S1.** Disruption of the 24 hour established biofilms of UAMS-1 (A, B, C and D) and Mu50 (E, F, G and H) by C14-KK, C14-RRR, Daptomycin and Vancomycin respectively.

**Figure S2.** HPLC chromatograms and MS of the lipopeptides

| <b>Peptide name</b> | <b>Peptide code</b> | <b>Purity (%)*</b> |
|---------------------|---------------------|--------------------|
| C14-KK              | G701                | 97.44              |
| C14-RRR             | G714                | 95.77              |
| C14-LK              | G702                | 96.84              |
| C14-RW              | G703                | 97.91              |
| C14-WR              | G704                | 95.26              |
| C14-EE              | G705                | 96.30              |
| C14-LE              | G706                | 96.27              |
| C14-WE              | G707                | 96.81              |
| C14-EW              | G708                | 95.85              |
| C14-WWK             | G709                | 95.72              |
| C14-LWE             | G710                | 98.03              |
| C14-KWI             | G711                | 95.29              |
| C14-LKW             | G712                | 96.58              |
| C14-LKK             | G713                | 95.91              |
| C14-LLK             | G715                | 96.77              |

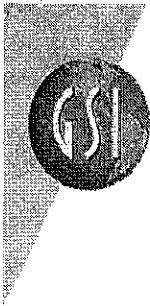

Genemed Synthesis, Inc.  
6203 Wood Lake Center Dr., Bldg. 2, San Antonio, TX 78244, USA  
Toll free (800) 344-5337; Phone: (210) 745-5988; Fax (210) 745-5992  
Email: [info@genemedsyn.com](mailto:info@genemedsyn.com), Website: [www.genemedsyn.com](http://www.genemedsyn.com)

PEPTIDE DATA SHEET

LOT NO: 95868  
NAME: G701  
SEQUENCE: Myr-KK-amide  
S14  
EXPECTED MASS: 483.4 ± 1.0  
AVERAGE MASS: 483.4  
SOLUBILITY: Not tested  
AMOUNT DELIVERED: 19mg  
PURITY: 97.44%  
COMMENTS: white to off-white powder or lumps  
DATE: 07/28/2014  
VERIFIED BY: Zhang L.Q.

7/11 ordered

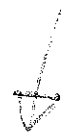

R 7/30/14 OK

# Customer Peptide HPLC Report

Sample name: 95868

Analyzed: 07/24/14 12:00 Vial Number: 95868

Reported: 07/28/14 09:53 Volume: 20.0ul

Column Type: 250\*4.6mm Kromasil C18 5u

Solvent A: 0.1%TFA acetonitrile

Solvent B: 0.1%TFA Water

Method: Gradient A:B, t=0.0mins 05:95 t=25.0mins 100:0

Wavelength: 220nm

Data Path: D:\HPLC\custom peptide\GS\95868\95868.hw

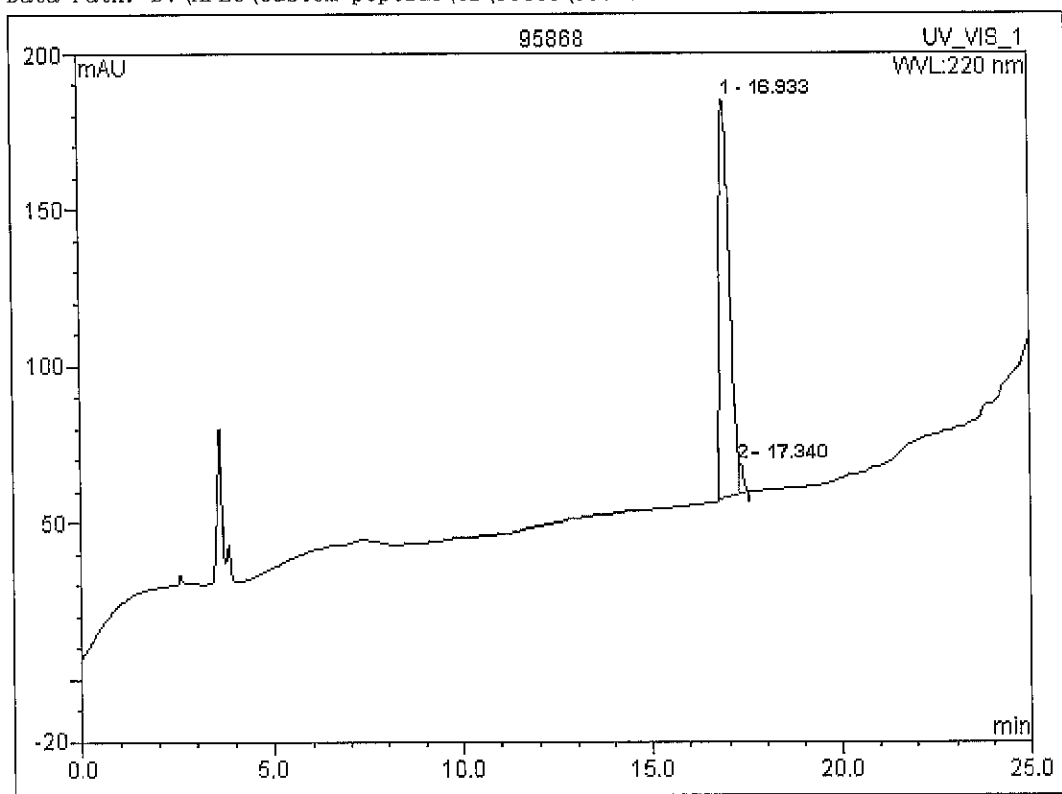

| No.           | Ret.Time<br>min | Height<br>mAU | Area<br>mAU*min | Rel.Area<br>% |
|---------------|-----------------|---------------|-----------------|---------------|
| 1             | 16.93           | 127.381       | 39.656          | 97.44         |
| 2             | 17.34           | 10.003        | 1.040           | 2.56          |
| <b>Total:</b> |                 |               | 40.696          | 100.000       |

95868

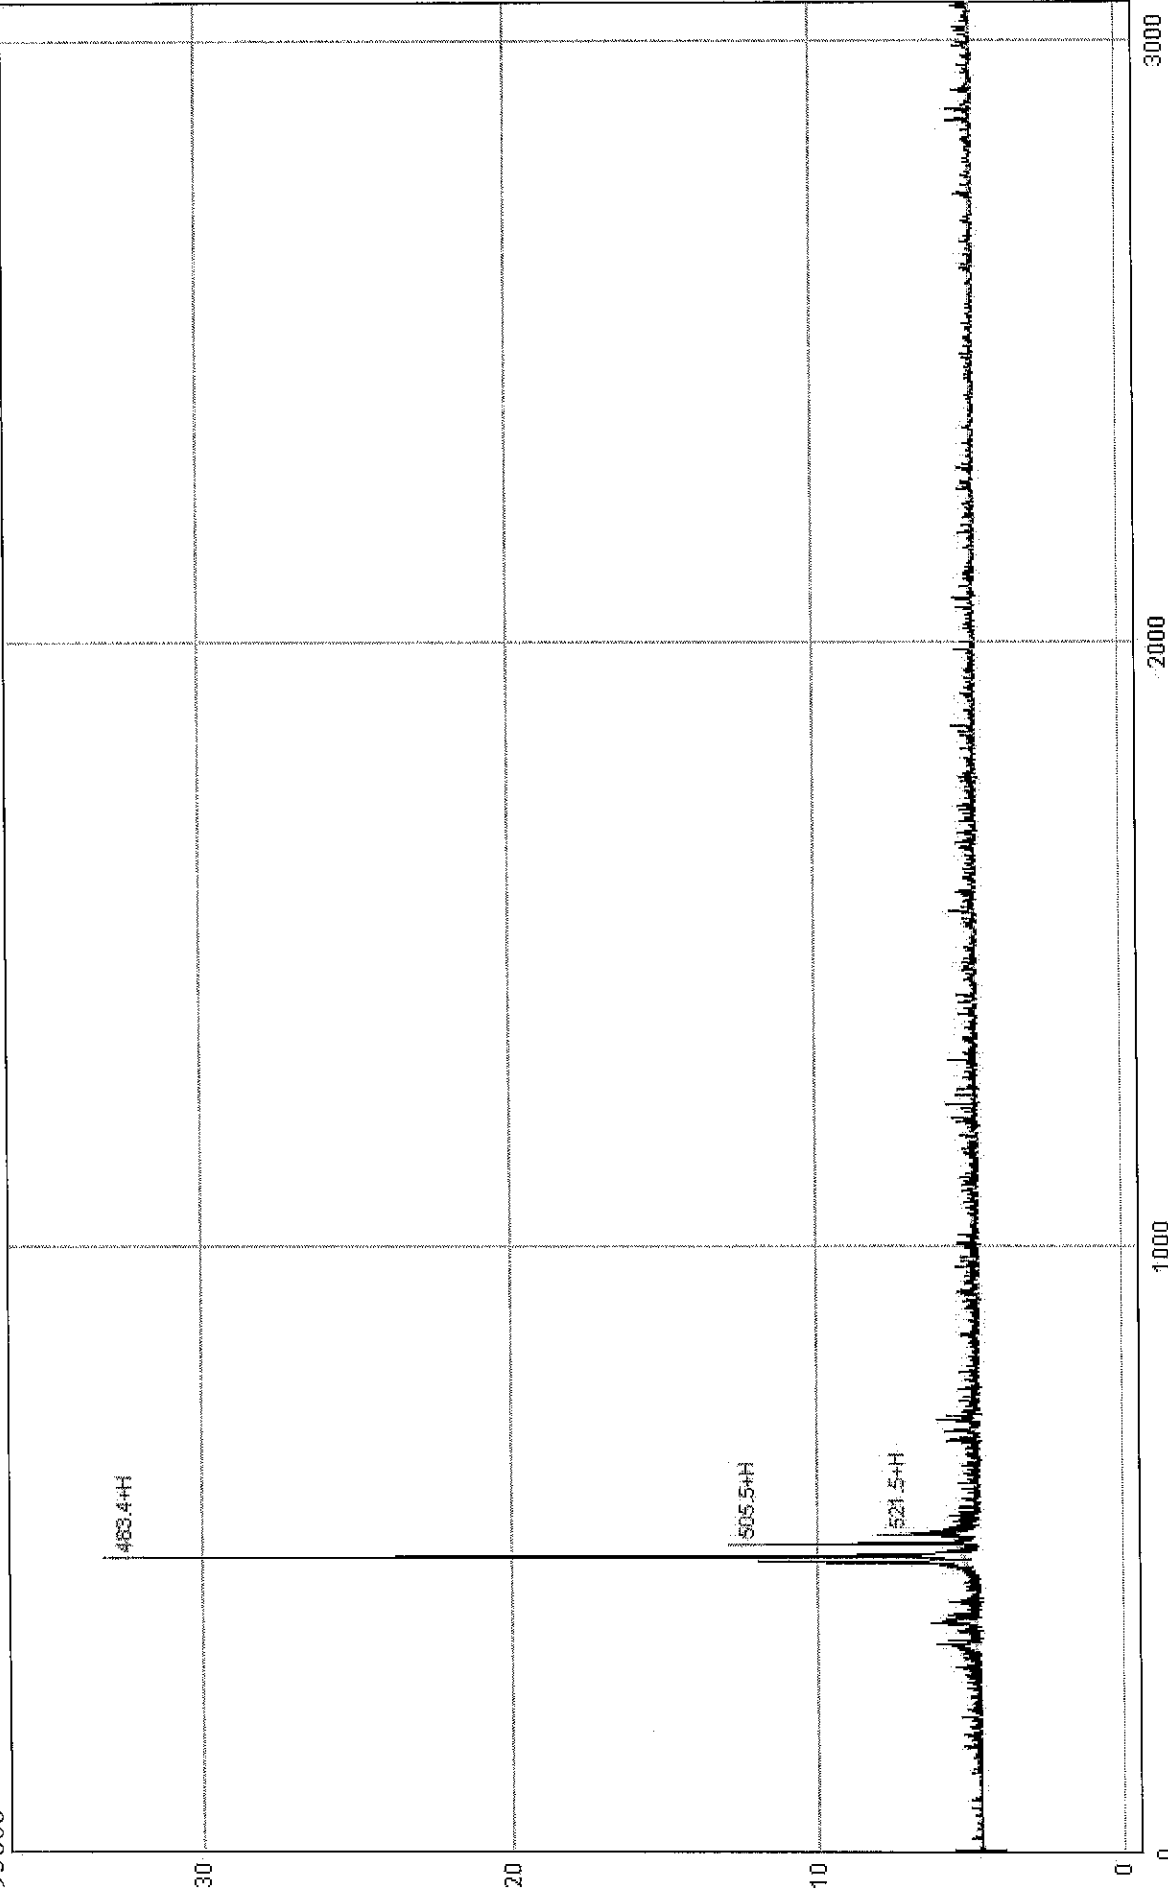



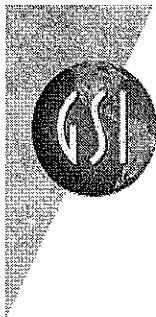

Genemed Synthesis, Inc.  
6203 Wood Lake Center Dr., Bldg. 2, San Antonio, TX 78244, USA  
Toll free (800) 344-5337; Phone: (210) 745-5988; Fax (210) 745-5992  
Email: [info@genemedsyn.com](mailto:info@genemedsyn.com), Website: [www.genemedsyn.com](http://www.genemedsyn.com)

PEPTIDE DATA SHEET

LOT NO: 95869

NAME: G702

SEQUENCE: Myr-LK-amide

EXPECTED MASS:  $468.3 \pm 1.0$

AVERAGE MASS: 468.6

SOULUBILITY: Not tested

AMOUNT DELIVERED: 19mg

PURITY: 96.84%

COMMENTS: white to off-white powder or lumps

DATE: 07/23/2014

VERIFIED BY: Zhang .z.g

# Customer Peptide HPLC Report

Sample name: 95869

Analyzed: 07/17/14 14:18 Vial Number: 95869

Reported: 07/23/14 13:03 Volume: 20.0ul

Column Type: 250\*4.6mm Kromasil C18 5u

Solvent A: 0.1%TFA acetonitrile

Solvent B: 0.1%TFA Water

Method: Gradient A:B, t=0.0mins 35:65 t=30.0mins 75:25

Wavelength: 220nm

Data Path: D:\HPLC\custom peptide\GS\95869\95869.hw:

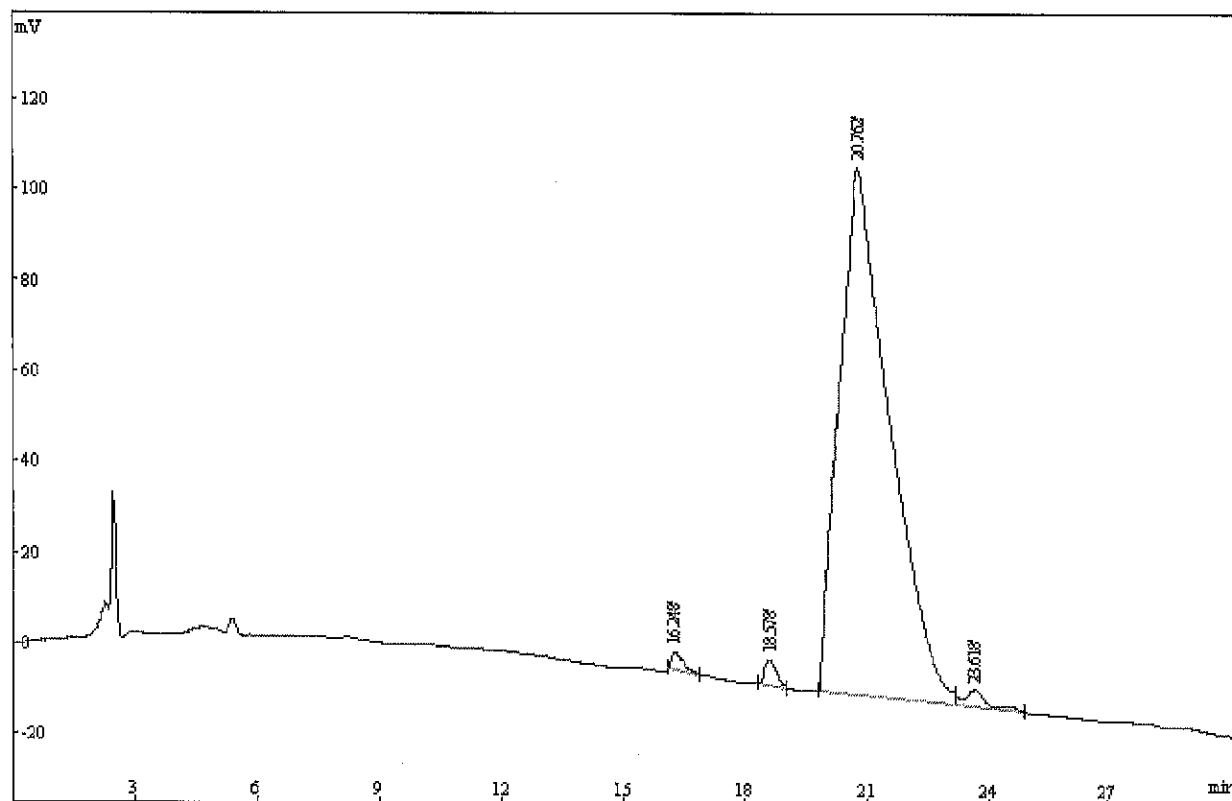

| No.   | RT     | Area% | Area     |
|-------|--------|-------|----------|
| 1     | 16.248 | 0.753 | 77668    |
| 2     | 18.578 | 1.072 | 110591   |
| 3     | 20.762 | 96.84 | 9988882  |
| 4     | 23.618 | 1.341 | 138302   |
| Total |        | 100   | 10315443 |

95869

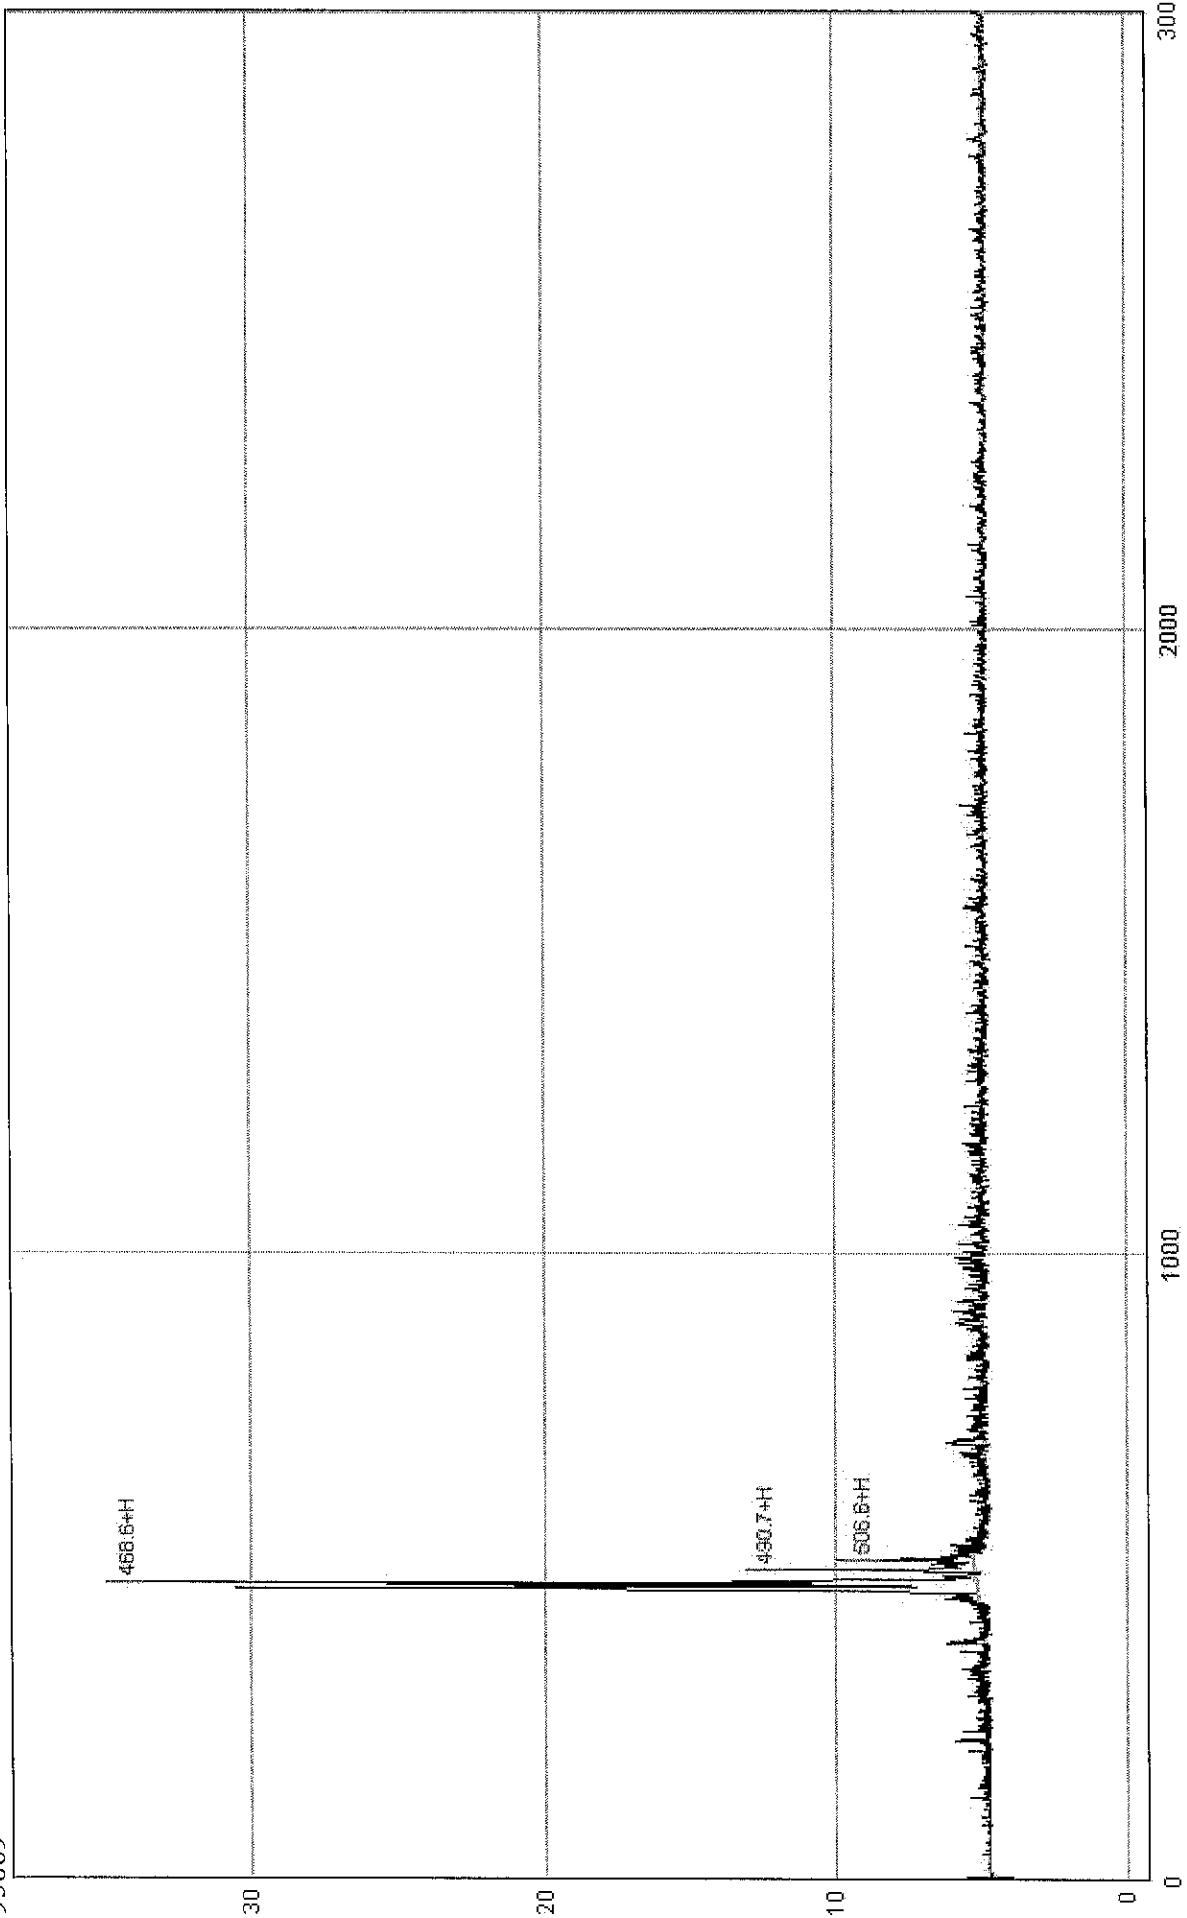

3000

2000

1000

0

Genemed Synthesis, Inc.

6203 Wood Lake Center Dr., Bldg. 2, San Antonio, TX 78244, USA  
Toll free (800) 344-5337; Phone: (210) 745-5988; Fax (210) 745-5992  
Email: [info@genemedsyn.com](mailto:info@genemedsyn.com), Website: [www.genemedsyn.com](http://www.genemedsyn.com)

PEPTIDE DATA SHEET

LOT NO: 95870

NAME: G703

SEQUENCE: Myr-RW-amide

EXPECTED MASS:  $569.4 \pm 1.0$

AVERAGE MASS: 569.7

SOULUBILITY: Not tested

AMOUNT DELIVERED: 19mg

PURITY: 97.91%

COMMENTS: white to off-white powder or lumps

DATE: 07/23/2014

VERIFIED BY: Zhang Z-Q

# Customer Peptide HPLC Report

Sample name: 95870

Analyzed: 07/21/14 15:49 Vial Number: 95870

Reported: 07/23/14 10:02 Volume: 20.0ul

Column Type: 250\*4.6mm Kromasil C18 5u

Solvent A: 0.1%TFA acetonitrile

Solvent B: 0.1%TFA Water

Method: Gradient A:B, t=0.0mins 30:70 t=25.0mins 100:0

Wavelength: 220nm

Data Path: D:\HPLC\custom peptide\GS\95870\95870.hw

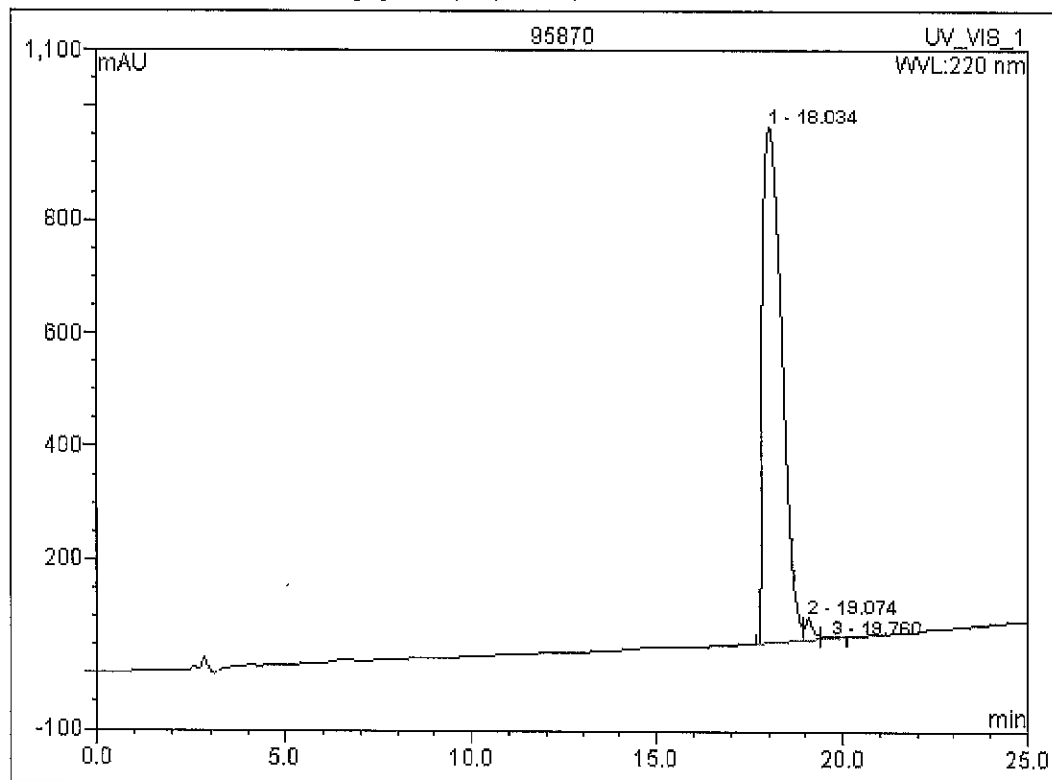

| No.           | Ret.Time<br>min | Height<br>mAU | Area<br>mAU*min | Rel.Area<br>%  |
|---------------|-----------------|---------------|-----------------|----------------|
| 1             | 18.03           | 908.087       | 535.419         | 97.91          |
| 2             | 19.07           | 39.443        | 9.568           | 1.75           |
| 3             | 19.76           | 0.732         | 1.879           | 0.34           |
| <b>Total:</b> |                 |               | <b>546.866</b>  | <b>100.000</b> |

95870

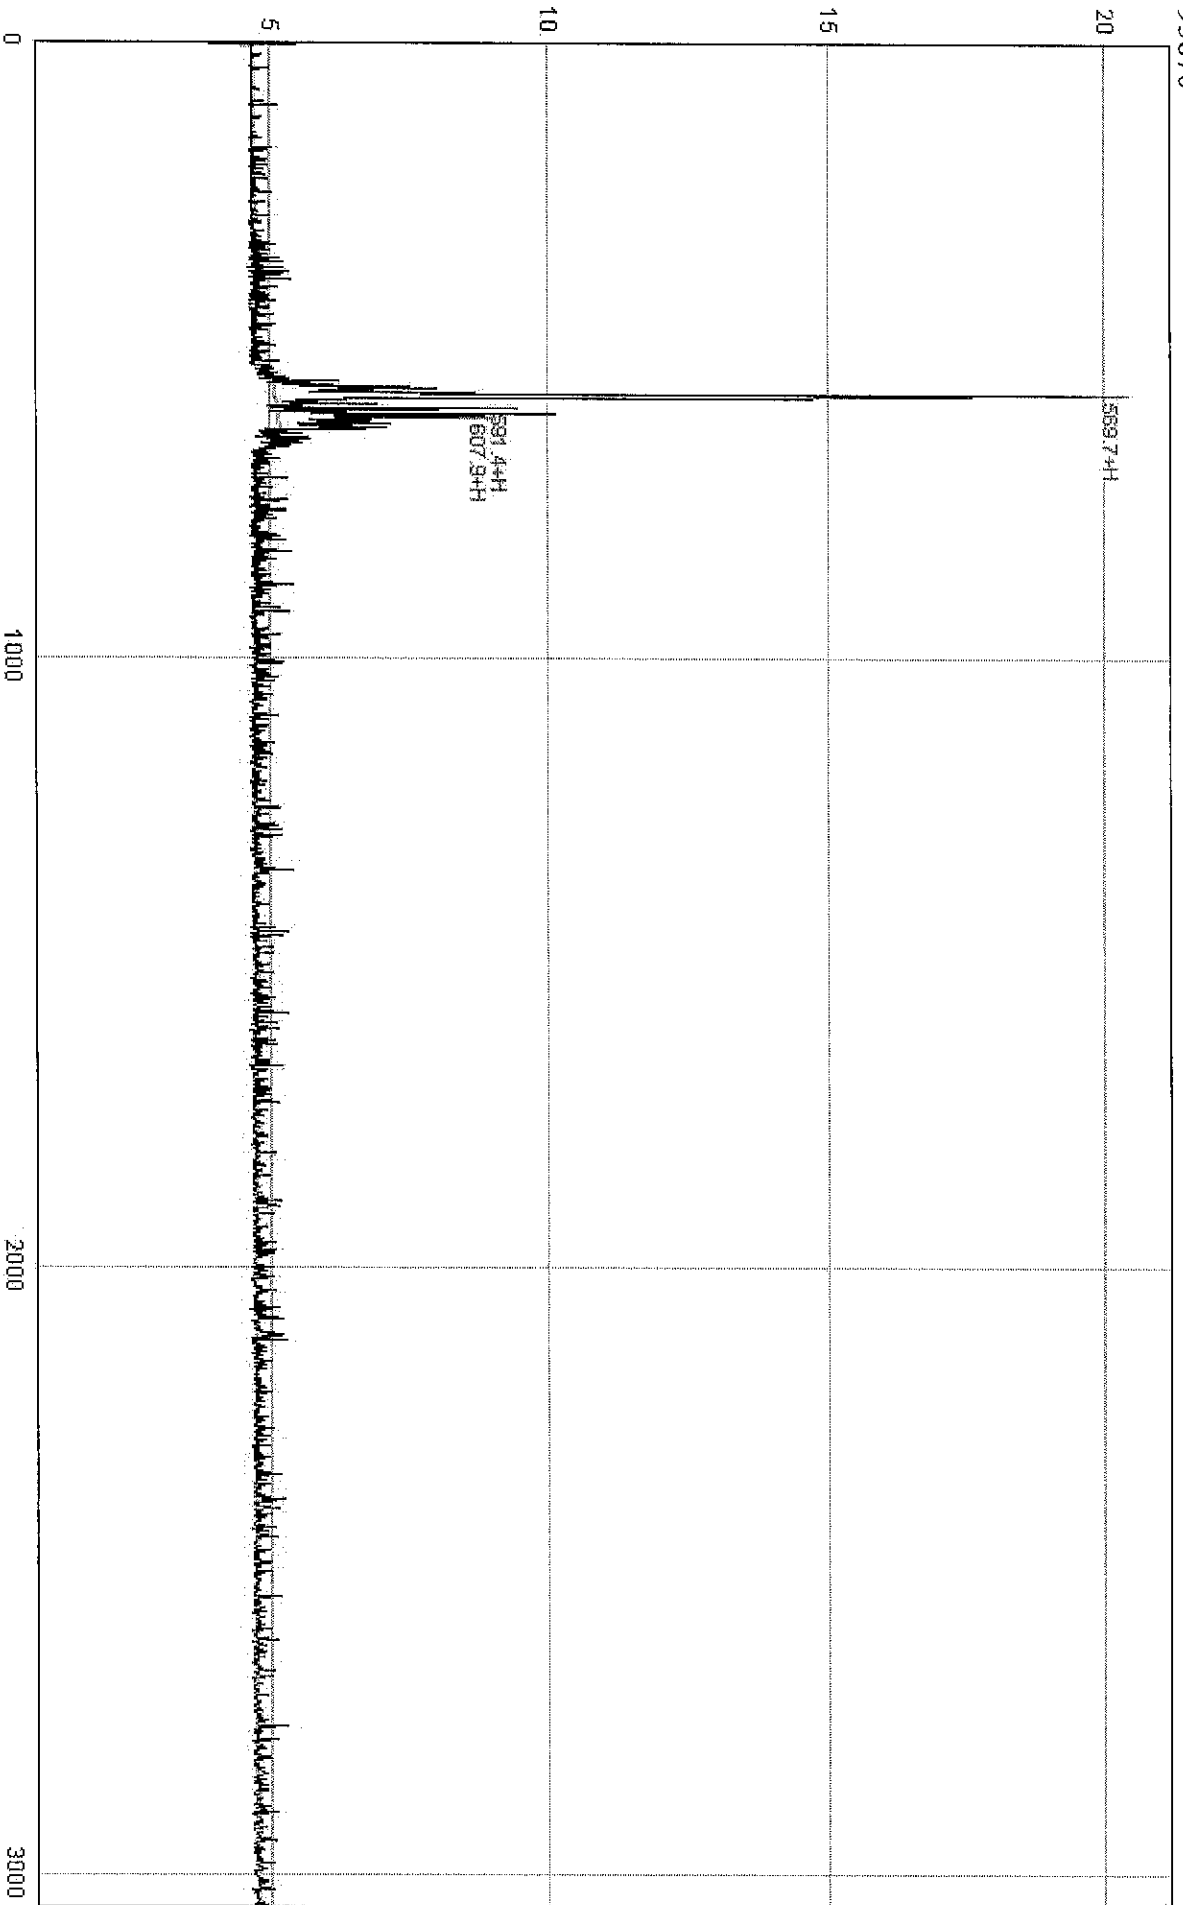

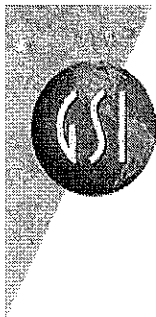

Genemed Synthesis, Inc.  
6203 Wood Lake Center Dr., Bldg. 2, San Antonio, TX 78244, USA  
Toll free (800) 344-5337; Phone: (210) 745-5988; Fax (210) 745-5992  
Email: [info@genemedsyn.com](mailto:info@genemedsyn.com), Website: [www.genemedsyn.com](http://www.genemedsyn.com)

PEPTIDE DATA SHEET

LOT NO: 95871

NAME: G704

SEQUENCE: Myr-WR-amide

EXPECTED MASS: 569.4 ± 1.0

AVERAGE MASS: 569.8

SOULUBILITY: Not tested

AMOUNT DELIVERED: 19mg

PURITY: 95.26%

COMMENTS: white to off-white powder or lumps

DATE: 07/28/2014

VERIFIED BY: Zhang Z.Q.

*hemo*  
*WR less than RW*

# Customer Peptide HPLC Report

Sample name: 95871

Analyzed: 07/25/14 12:49 Vial Number: 95871

Reported: 07/28/14 13:32 Volume: 20.0ul

Column Type: 250\*4.6mm Kromasil C18 5u

Solvent A: 0.1%TFA acetonitrile

Solvent B: 0.1%TFA Water

Method: Gradient A:B, t=0.0mins 10:90 t=30.0mins 100:0

Wavelength: 220nm

Data Path: D:\HPLC\custom peptide\GS\95871\95871.hw:

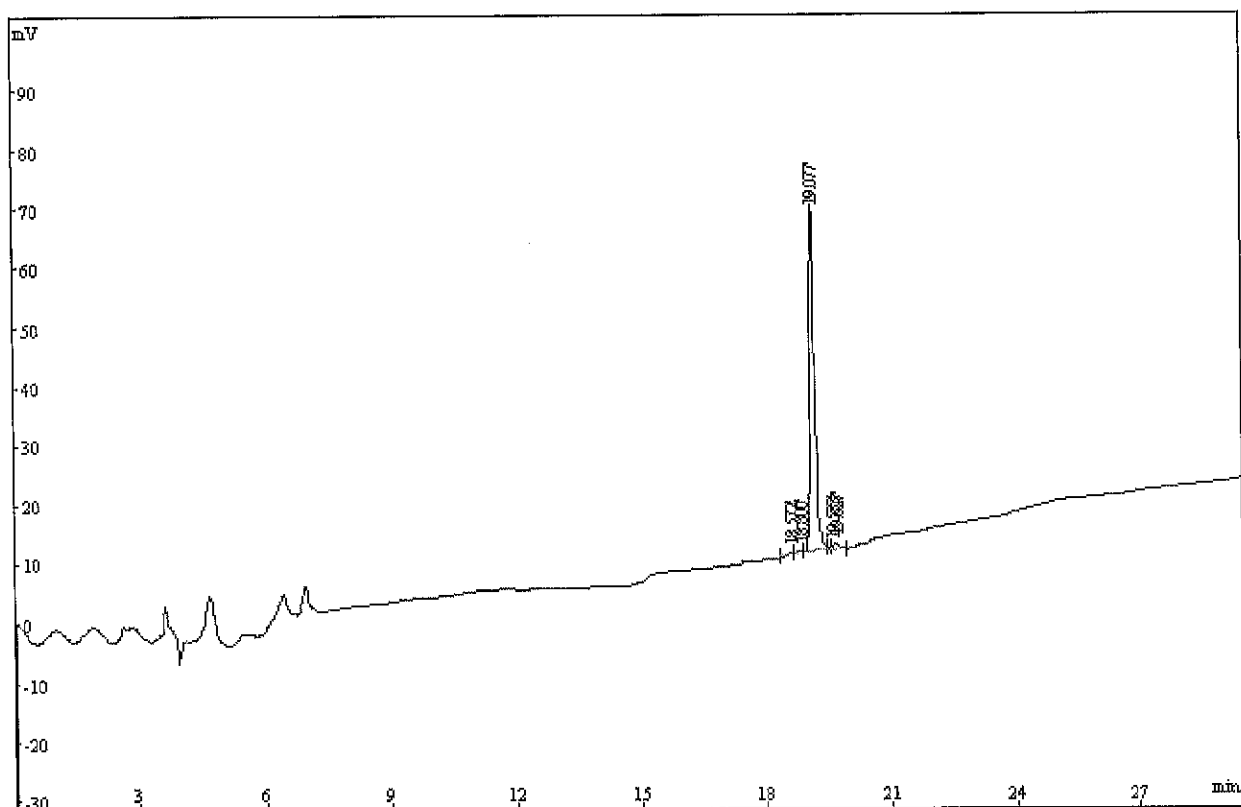

| No.   | RT     | Area%  | Area   |
|-------|--------|--------|--------|
| 1     | 18.572 | 0.8366 | 4428   |
| 2     | 18.800 | 1.599  | 8463   |
| 3     | 19.077 | 95.26  | 504176 |
| 4     | 19.533 | 0.4836 | 2559   |
| 5     | 19.627 | 1.82   | 9633   |
| Total |        | 100    | 529259 |



95871

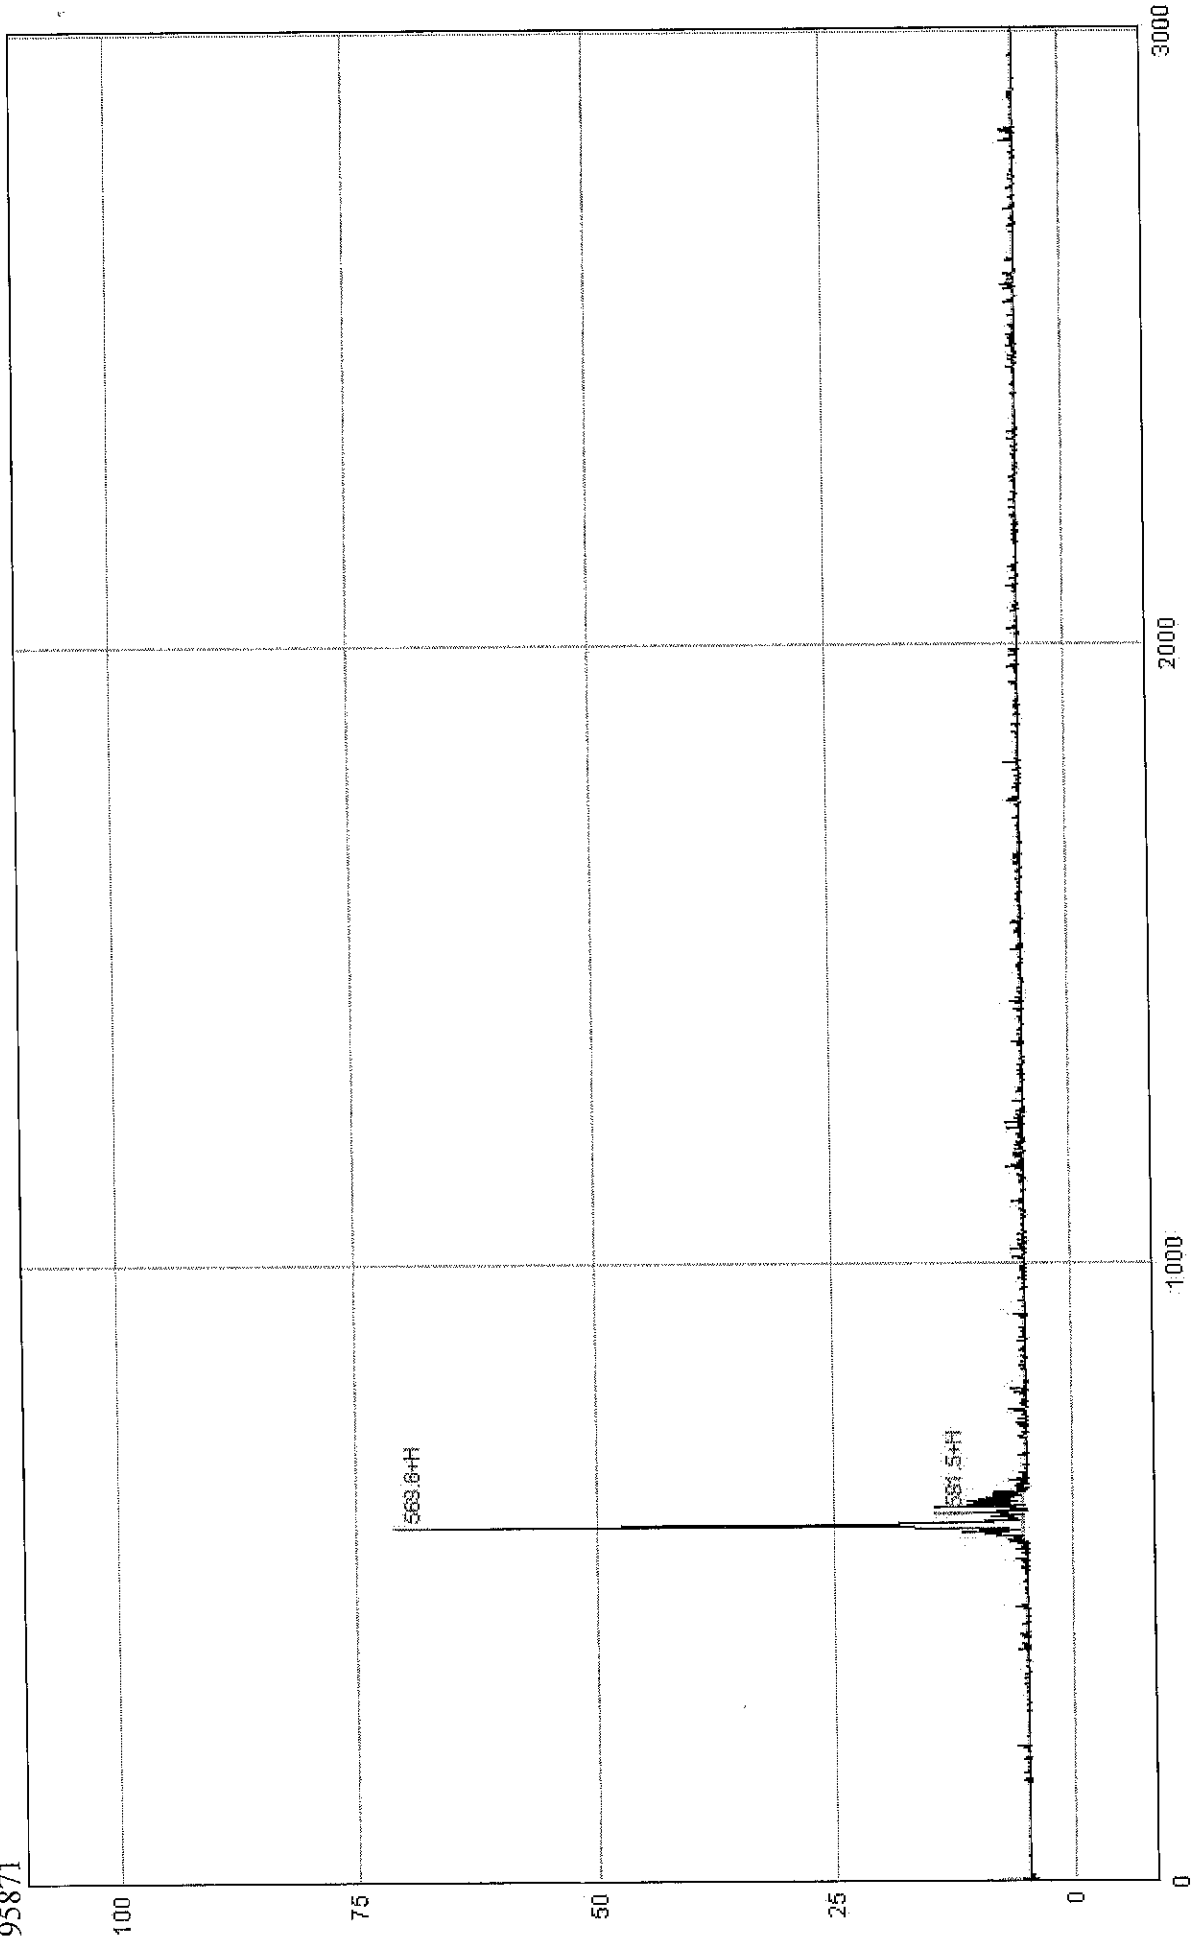

Genemed Synthesis, Inc.

6203 Wood Lake Center Dr., Bldg. 2, San Antonio, TX 78244, USA  
Toll free (800) 344-5337; Phone: (210) 745-5988; Fax (210) 745-5992  
Email: [info@genemedsyn.com](mailto:info@genemedsyn.com), Website: [www.genemedsyn.com](http://www.genemedsyn.com)

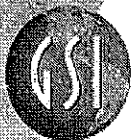

PEPTIDE DATA SHEET

LOT NO: 95876

NAME: G709

SEQUENCE: Myr-WWK-amide

EXPECTED MASS:  $727.6 \pm 1.0$

AVERAGE MASS: 727.9

SOULUBILITY: Not tested

AMOUNT DELIVERED: 19mg

PURITY: 95.72%

COMMENTS: off-white powder or lumps

DATE: 07/23/2014

VERIFIED BY: Zhang Z-q

# Customer Peptide HPLC Report

Sample name: 95876

Analyzed: 07/18/14 14:42 Vial Number: 95876

Reported: 07/23/14 13:09 Volume: 20.0ul

Column Type: 250\*4.6mm Kromasil C18 5u

Solvent A: 0.1%TFA acetonitrile

Solvent B: 0.1%TFA Water

Method: Gradient A:B, t=0.0mins 10:90 t=30.0mins 100:0

Wavelength: 220nm

Data Path: D:\HPLC\custom peptide\GS\95876\95876.hw

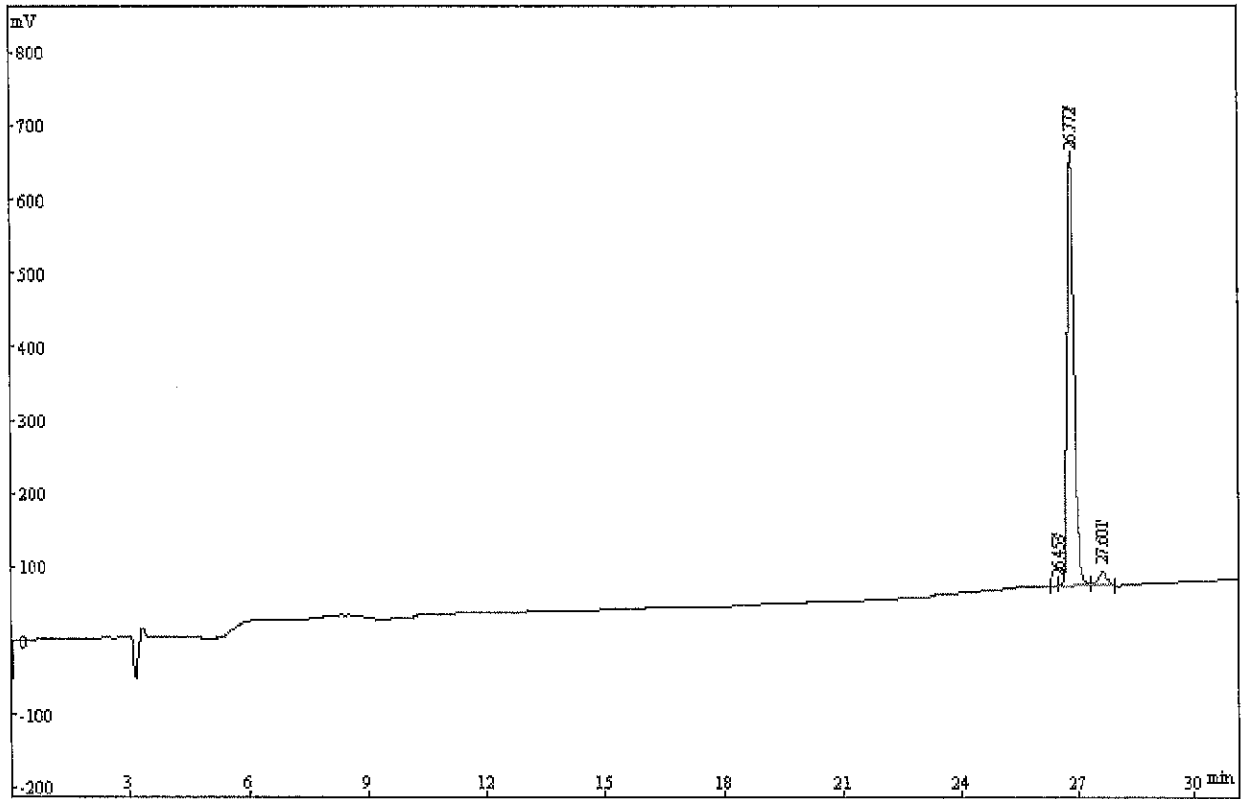

| No.   | RT     | Area%  | Area    |
|-------|--------|--------|---------|
| 1     | 26.453 | 0.2981 | 23537   |
| 2     | 26.772 | 95.72  | 7558726 |
| 3     | 27.601 | 3.981  | 314371  |
| Total |        | 100    | 7896634 |

95876

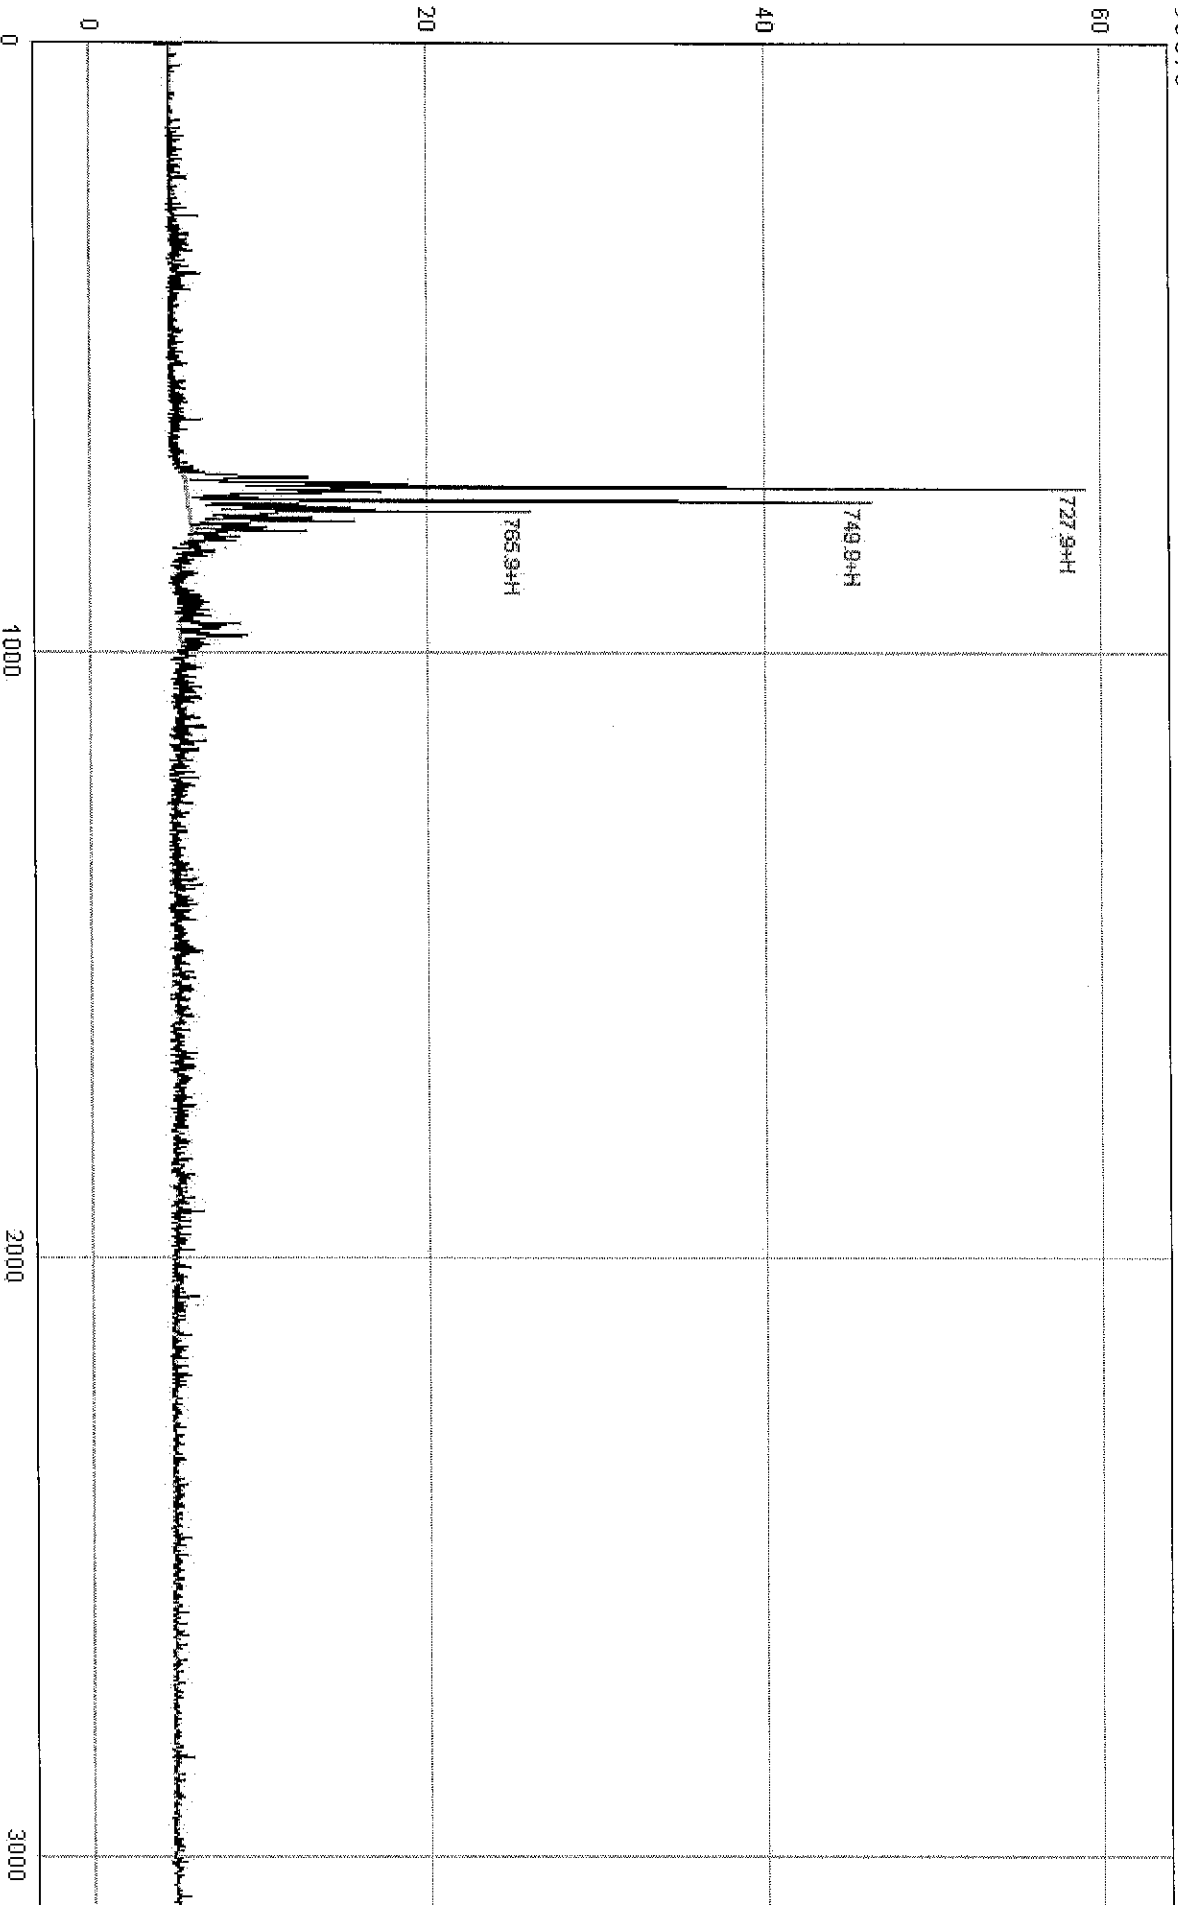

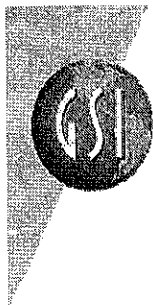

Genemed Synthesis, Inc.  
6203 Wood Lake Center Dr., Bldg. 2, San Antonio, TX 78244, USA  
Toll free (800) 344-5337; Phone: (210) 745-5988; Fax (210) 745-5992  
Email: [info@genemedsyn.com](mailto:info@genemedsyn.com), Website: [www.genemedsyn.com](http://www.genemedsyn.com)

PEPTIDE DATA SHEET

LOT NO: 95877

NAME: G710

SEQUENCE: Myr-LWE-amide *R 8/22/14 O/C*

EXPECTED MASS:  $655.5 \pm 1.0$

AVERAGE MASS: 655.6

SOULUBILITY: Not tested

AMOUNT DELIVERED: 19mg

PURITY: 98.03%

COMMENTS: white to off-white powder or lumps

DATE: 08/13/2014

VERIFIED BY: *Zhang z-q*

# Customer Peptide HPLC Report

Sample name: 95877

Analyzed:08/08/14 15:46 Vail Number: 95877

Reported:08/13/14 10:33 Volume:20.0ul

Column Type: 250\*4.6mm Kromasil C18 5u

Solvent A:0.1%TFA acetonitrile

Solvent B:0.1%TFA Water

Method: Gradient A:B, t=0.0mins 10:90 t=30.0mins 100:0

Wavelength: 220nm

Data Path: D:\HPLC\custom peptide\GS\95877\95877.hw:

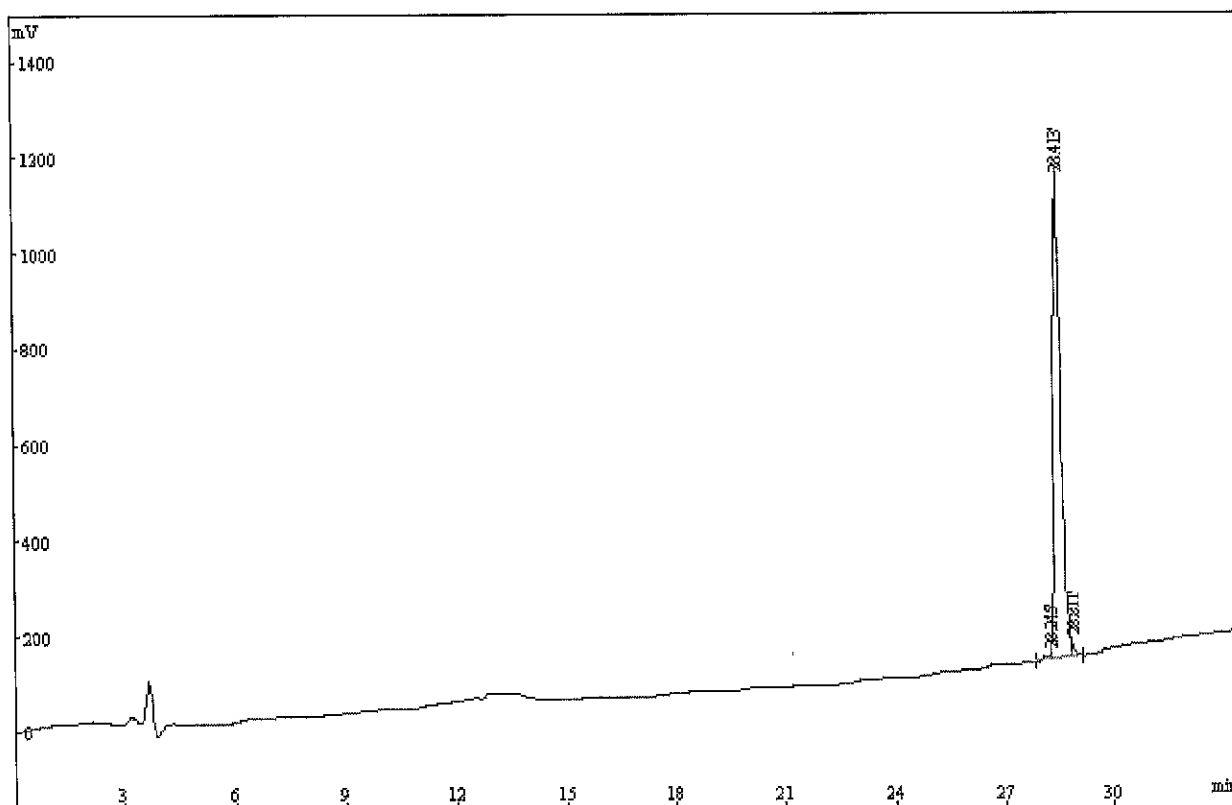

| No.   | RT     | Area%  | Area     |
|-------|--------|--------|----------|
| 1     | 28.245 | 0.8207 | 113851   |
| 2     | 28.413 | 98.03  | 13597930 |
| 3     | 28.811 | 1.151  | 159604   |
| Total |        | 100    | 13871385 |

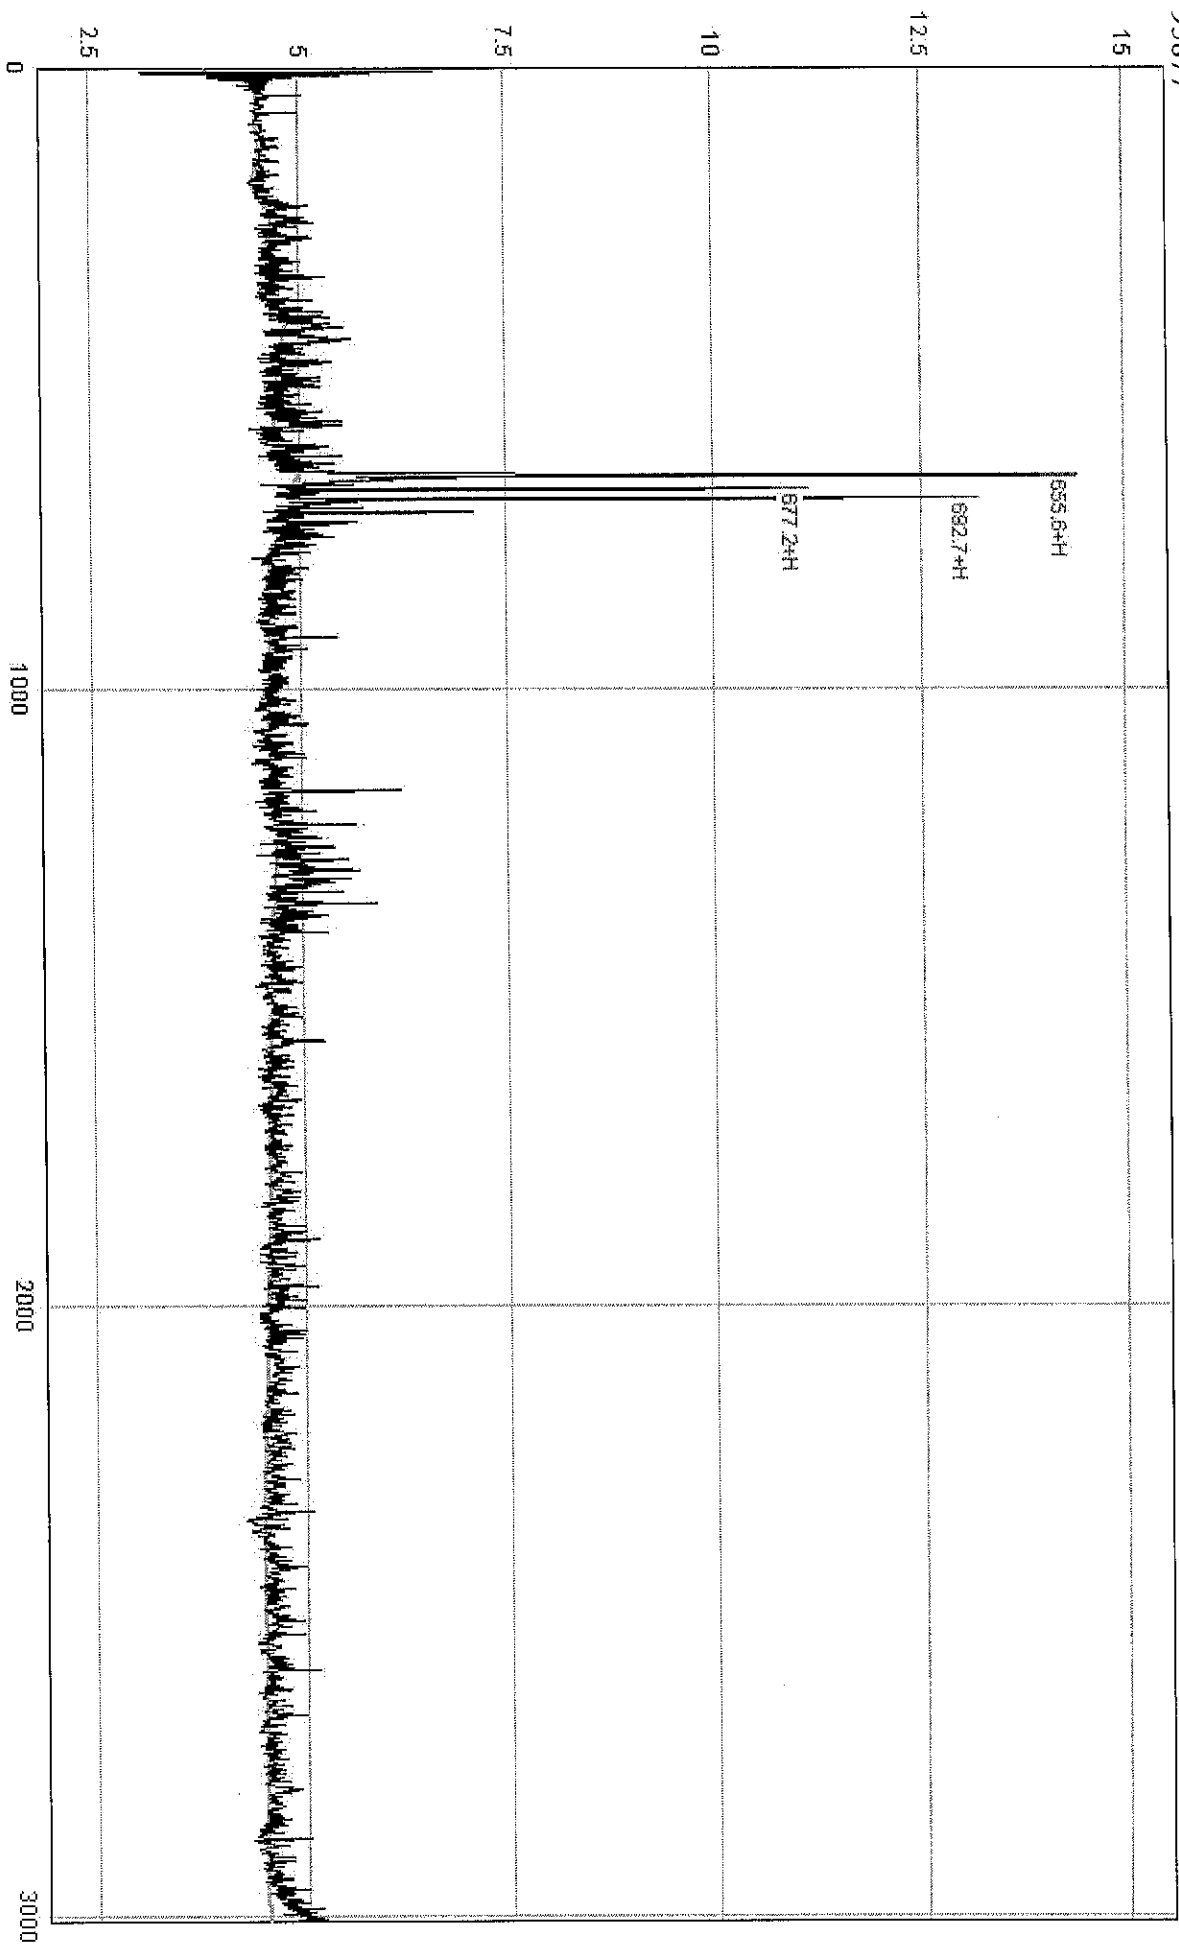

Genemed Synthesis, Inc.

6203 Wood Lake Center Dr., Bldg. 2, San Antonio, TX 78244, USA  
Toll free (800) 344-5337; Phone: (210) 745-5988; Fax (210) 745-5992  
Email: [info@genemedsyn.com](mailto:info@genemedsyn.com), Website: [www.genemedsyn.com](http://www.genemedsyn.com)

PEPTIDE DATA SHEET

LOT NO: 95878

NAME: G711

SEQUENCE: Myr-KWI-amide

EXPECTED MASS:  $654.4 \pm 1.0$

AVERAGE MASS: 654.6

SOULUBILITY: Not tested

AMOUNT DELIVERED: 19mg

PURITY: 95.29%

COMMENTS: yellow powder or lumps

DATE: 07/23/2014

VERIFIED BY: Zhang Z.Y



# Customer Peptide HPLC Report

Sample name: 95878

Analyzed:07/18/14 15:18 Vail Number: 95878

Reported:07/23/14 13:07 Volume:20.0ul

Column Type: 250\*4.6mm Kromasil C18 5u

Solvent A:0.1%TFA acetonitrile

Solvent B:0.1%TFA Water

Method: Gradient A:B, t=0.0mins 10:90 t=30.0mins 100:0

Wavelength: 220nm

Data Path: D:\HPLC\custom peptide\GS\95878\95878.hw:

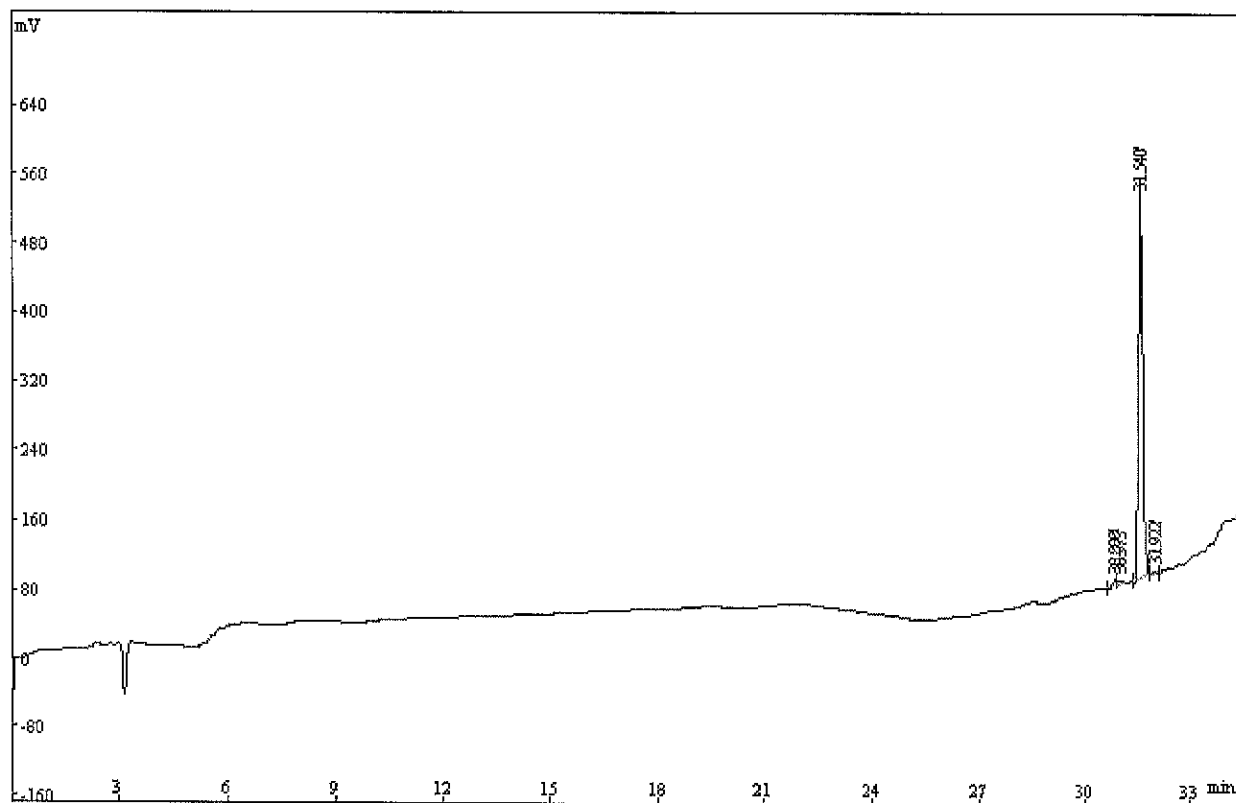

| No.   | RT     | Area% | Area    |
|-------|--------|-------|---------|
| 1     | 30.808 | 1.868 | 70809   |
| 2     | 30.973 | 1.667 | 63201   |
| 3     | 31.540 | 95.29 | 3612554 |
| 4     | 31.922 | 1.181 | 44764   |
| <hr/> |        |       |         |
| Total |        | 100   | 3791328 |

95878

20

15

10

5

0

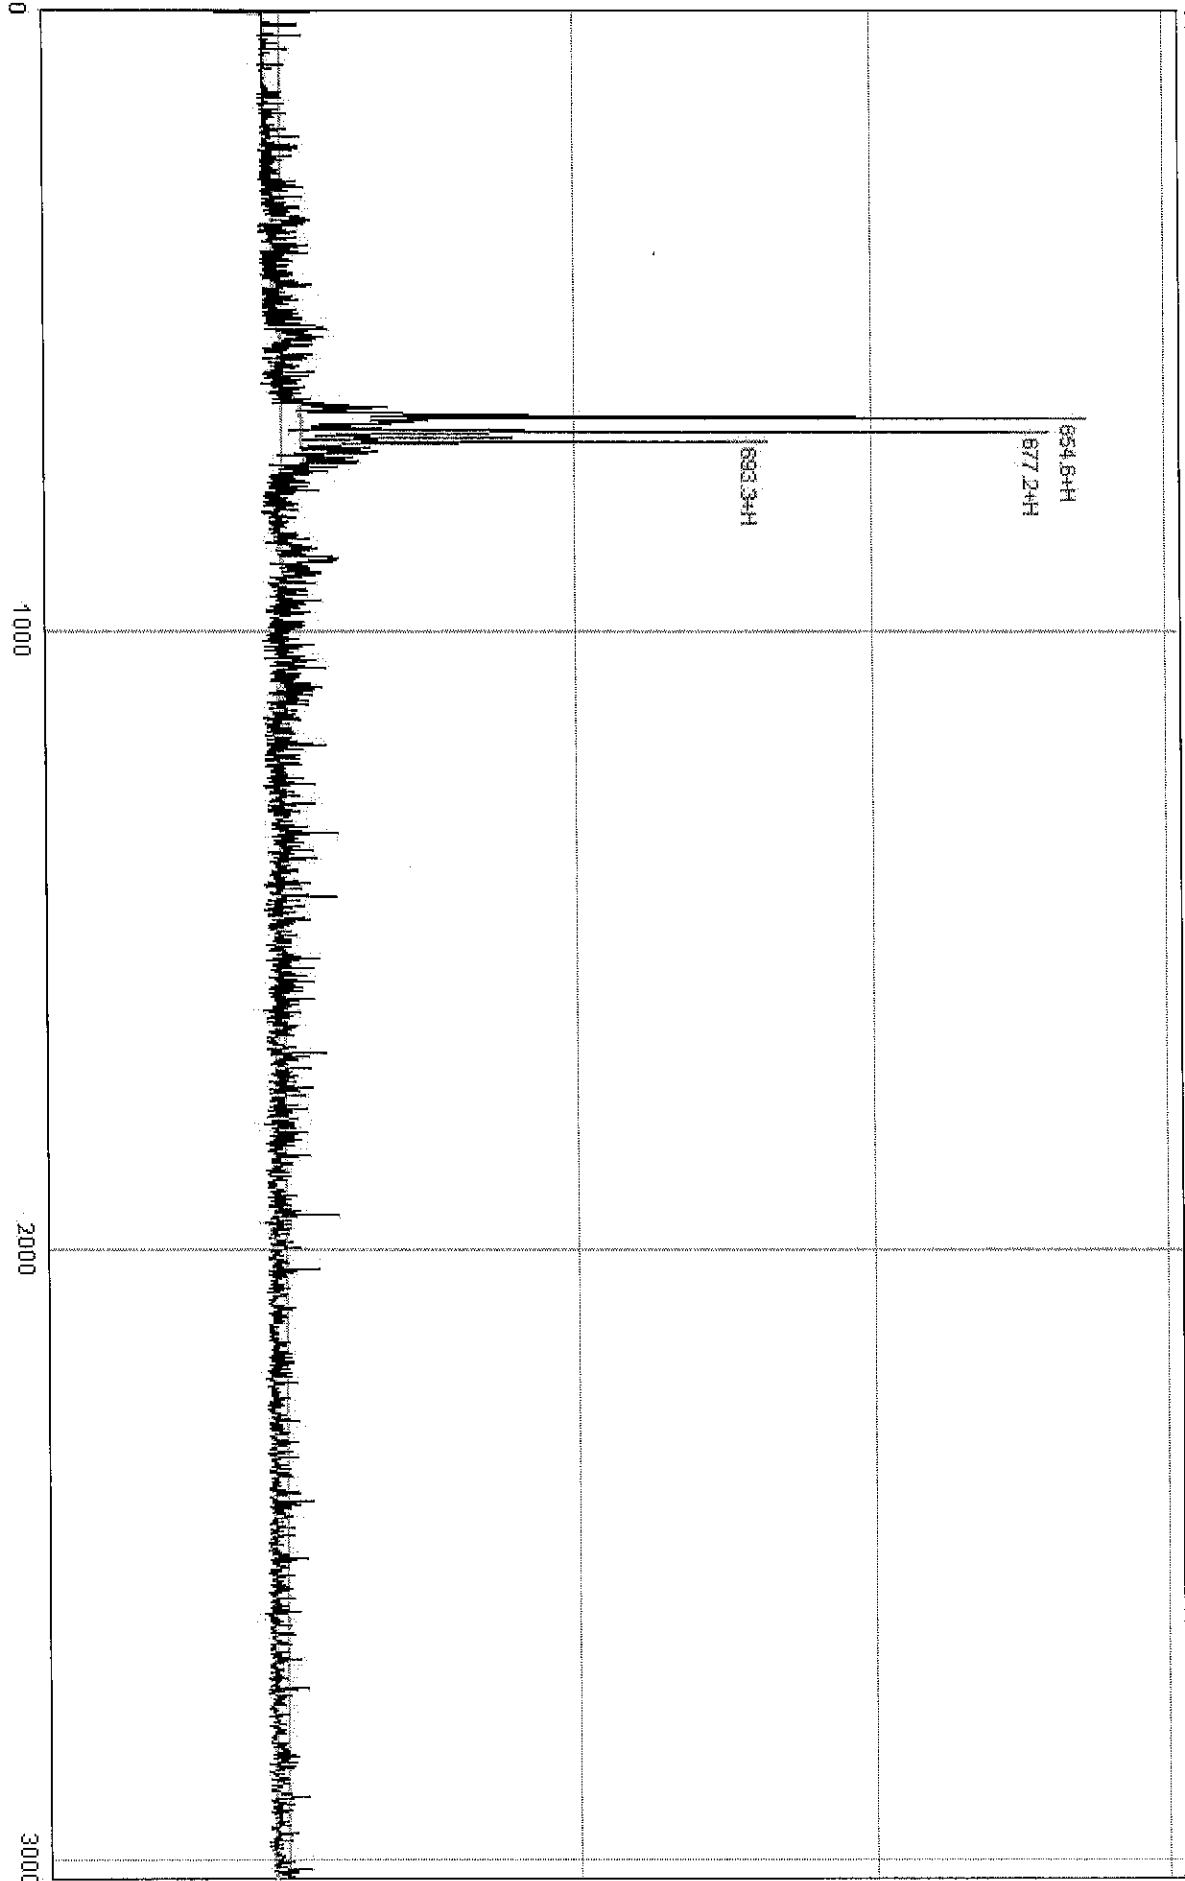

1000

2000

3000

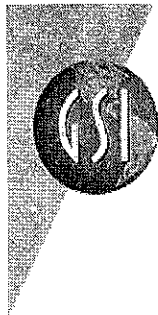

Genemed Synthesis, Inc.  
6203 Wood Lake Center Dr., Bldg. 2, San Antonio, TX 78244, USA  
Toll free (800) 344-5337; Phone: (210) 745-5988; Fax (210) 745-5992  
Email: [info@genemedsyn.com](mailto:info@genemedsyn.com), Website: [www.genemedsyn.com](http://www.genemedsyn.com)

PEPTIDE DATA SHEET

LOT NO: 95879

NAME: G712  
R 8/22/14

SEQUENCE: Myr-LKW-amide

EXPECTED MASS:  $654.5 \pm 1.0$

AVERAGE MASS: 654.7

SOULUBILITY: Not tested

AMOUNT DELIVERED: 19mg

PURITY: 96.58%

COMMENTS: off-white powder or lumps

DATE: 08/13/2014

VERIFIED BY: Zhang z-q

# Customer Peptide HPLC Report

Sample name: 95879

Analyzed:08/08/14 15:09 Vail Number: 95879

Reported:08/13/14 10:31 Volume:20.0ul

Column Type: 250\*4.6mm Kromasil C18 5u

Solvent A:0.1%TFA acetonitrile

Solvent B:0.1%TFA Water

Method: Gradient A:B, t=0.0mins 10:90 t=30.0mins 100:0

Wavelength: 220nm

Data Path: D:\HPLC\custom peptide\GS\95879\95879.hw:

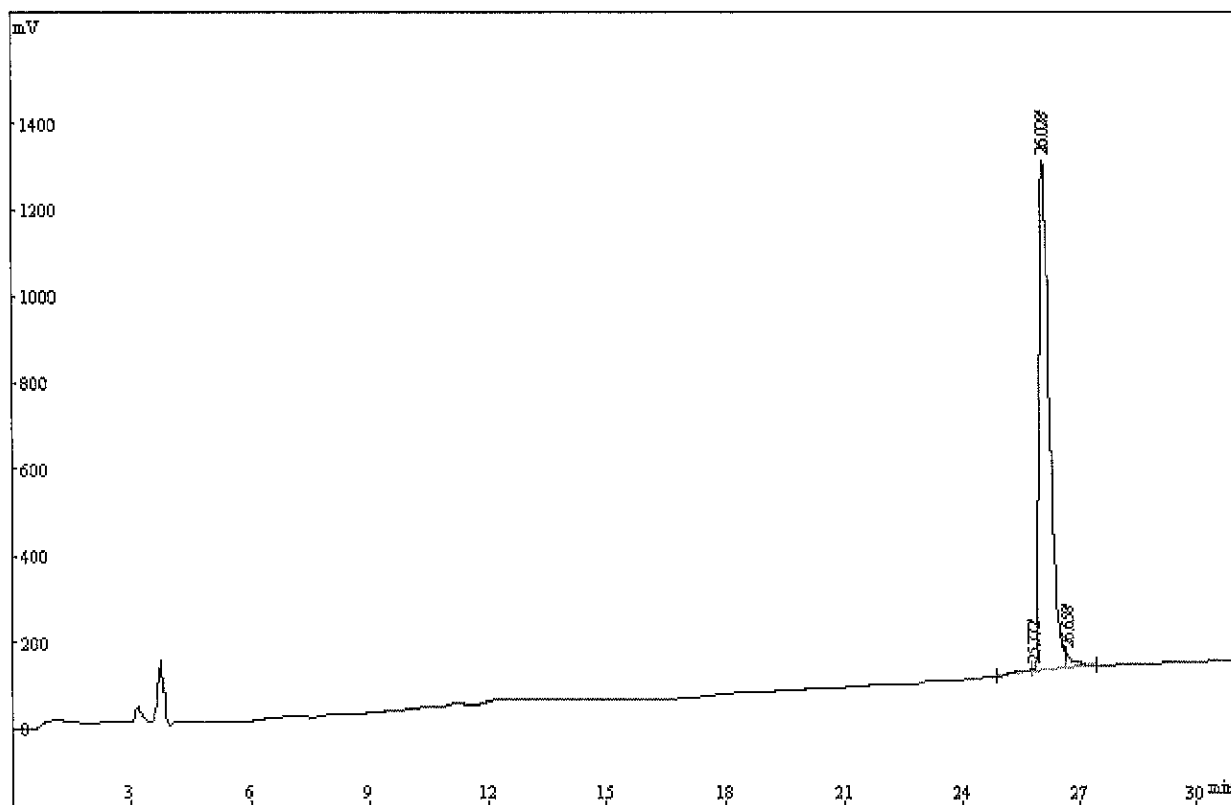

| No.   | RT     | Area% | Area     |
|-------|--------|-------|----------|
| 1     | 25.772 | 1.016 | 227375   |
| 2     | 26.028 | 96.58 | 21612608 |
| 3     | 26.658 | 2.41  | 539218   |
| Total |        | 100   | 22379201 |

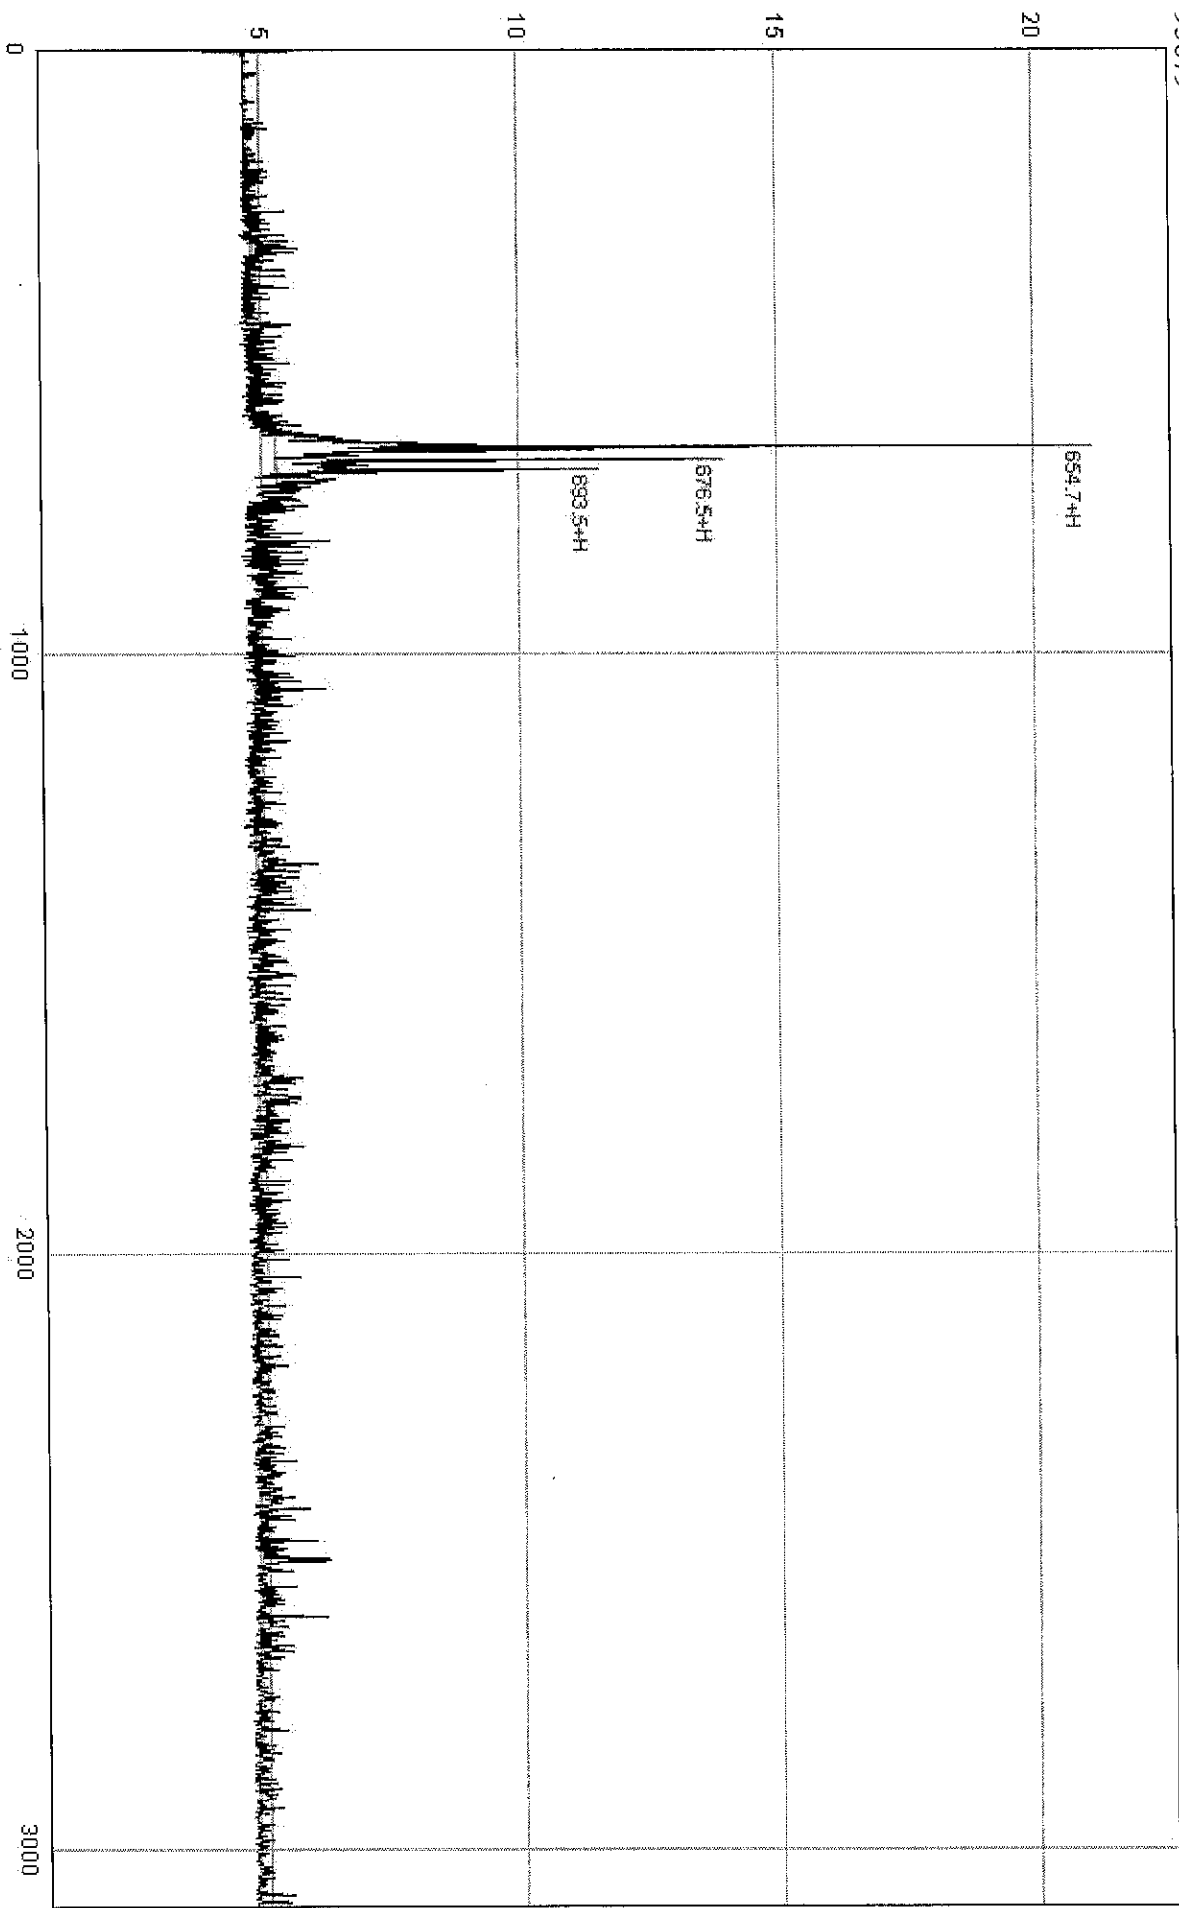

Genemed Synthesis, Inc.

6203 Wood Lake Center Dr., Bldg. 2, San Antonio, TX 78244, USA  
Toll free (800) 344-5337; Phone: (210) 745-5988; Fax (210) 745-5992  
Email: [info@genemedsyn.com](mailto:info@genemedsyn.com), Website: [www.genemedsyn.com](http://www.genemedsyn.com)

PEPTIDE DATA SHEET

LOT NO: 95880

NAME: G713

SEQUENCE: Myr-LKK-amide

EXPECTED MASS:  $596.5 \pm 1.0$

AVERAGE MASS: 596.7

SOULUBILITY: Not tested

AMOUNT DELIVERED: 19mg

PURITY: 95.91%

COMMENTS: white to off-white powder or lumps

DATE: 07/28/2014

VERIFIED BY: Zhang .z.g

# Customer Peptide HPLC Report

Sample name: 95880

Analyzed: 07/25/14 15:17 Vial Number: 95880

Reported: 07/28/14 13:34 Volume: 20.0ul

Column Type: 250\*4.6mm Kromasil C4 5u

Solvent A: 0.1%TFA acetonitrile

Solvent B: 0.1%TFA Water

Method: Gradient A:B, t=0.0mins 10:90 t=30.0mins 100:0

Wavelength: 220nm

Data Path: D:\HPLC\custom peptide\GS\95880\95880.hw:

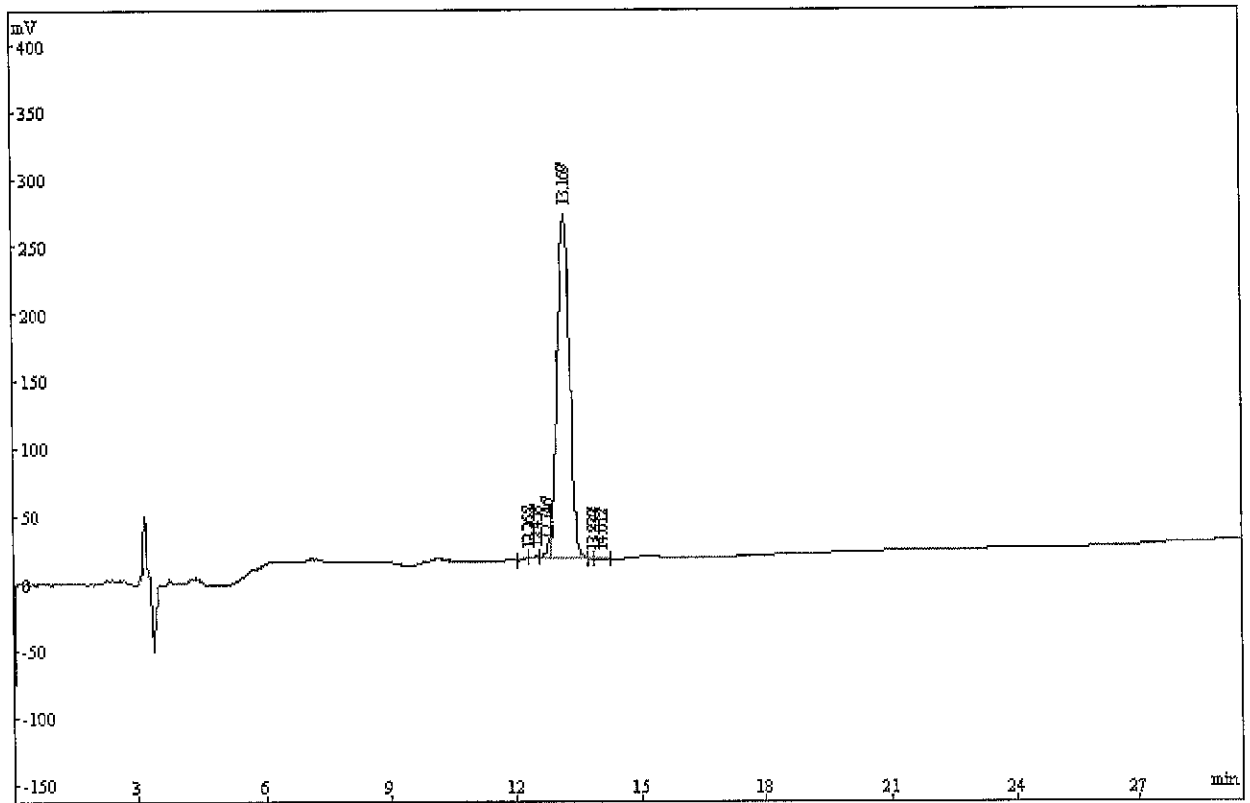

| No.   | RT     | Area%   | Area    |
|-------|--------|---------|---------|
| 1     | 12.265 | 0.2164  | 11853   |
| 2     | 12.458 | 0.5815  | 31860   |
| 3     | 12.746 | 3.104   | 170051  |
| 4     | 13.169 | 95.91   | 5254659 |
| 5     | 13.839 | 0.05101 | 2795    |
| 6     | 14.012 | 0.1306  | 7156    |
| <hr/> |        |         |         |
| Total |        | 100     | 5478374 |

95880

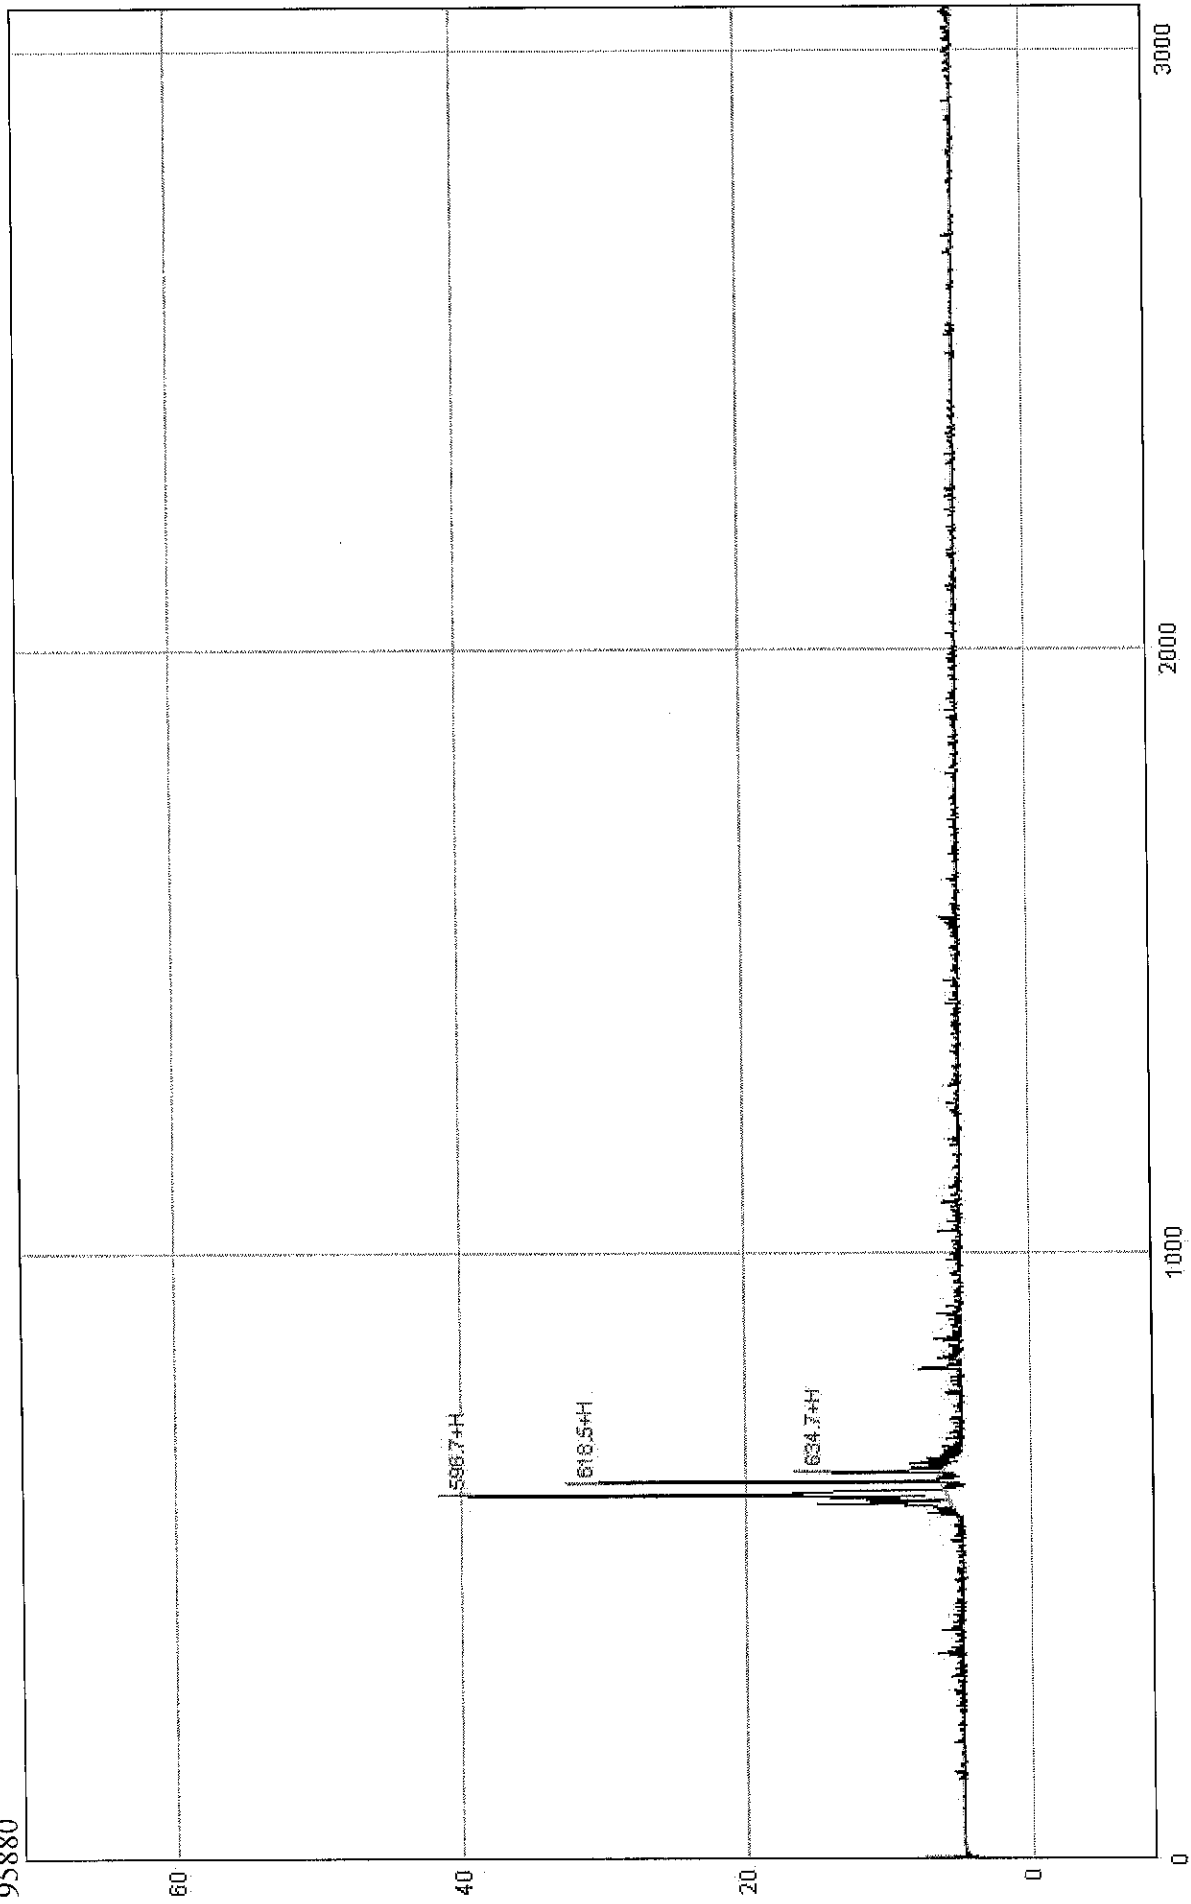



Genemed Synthesis, Inc.

6203 Wood Lake Center Dr., Bldg. 2, San Antonio, TX 78244, USA  
Toll free (800) 344-5337; Phone: (210) 745-5988; Fax (210) 745-5992  
Email: [info@genemedsyn.com](mailto:info@genemedsyn.com), Website: [www.genemedsyn.com](http://www.genemedsyn.com)

PEPTIDE DATA SHEET

LOT NO: 95881

NAME: G714

SEQUENCE: Myr-RRR-amide

EXPECTED MASS:  $695.5 \pm 1.0$

AVERAGE MASS: 695.5

SOULUBILITY: Not tested

AMOUNT DELIVERED: 19mg

PURITY: 95.77%

COMMENTS: white to off-white powder or lumps

DATE: 07/23/2014

VERIFIED BY: Zhang .z.g

# Customer Peptide HPLC Report

Sample name: 95881

Analyzed: 07/19/14 09:55 Vial Number: 95881

Reported: 07/23/14 12:59 Volume: 20.0ul

Column Type: 250\*4.6mm Kromasil C18 5u

Solvent A: 0.1%TFA acetonitrile

Solvent B: 0.1%TFA Water

Method: Gradient A:B, t=0.0mins 25:75 t=30.0mins 65:35

Wavelength: 220nm

Data Path: D:\HPLC\custom peptide\GS\95881\95881.hw

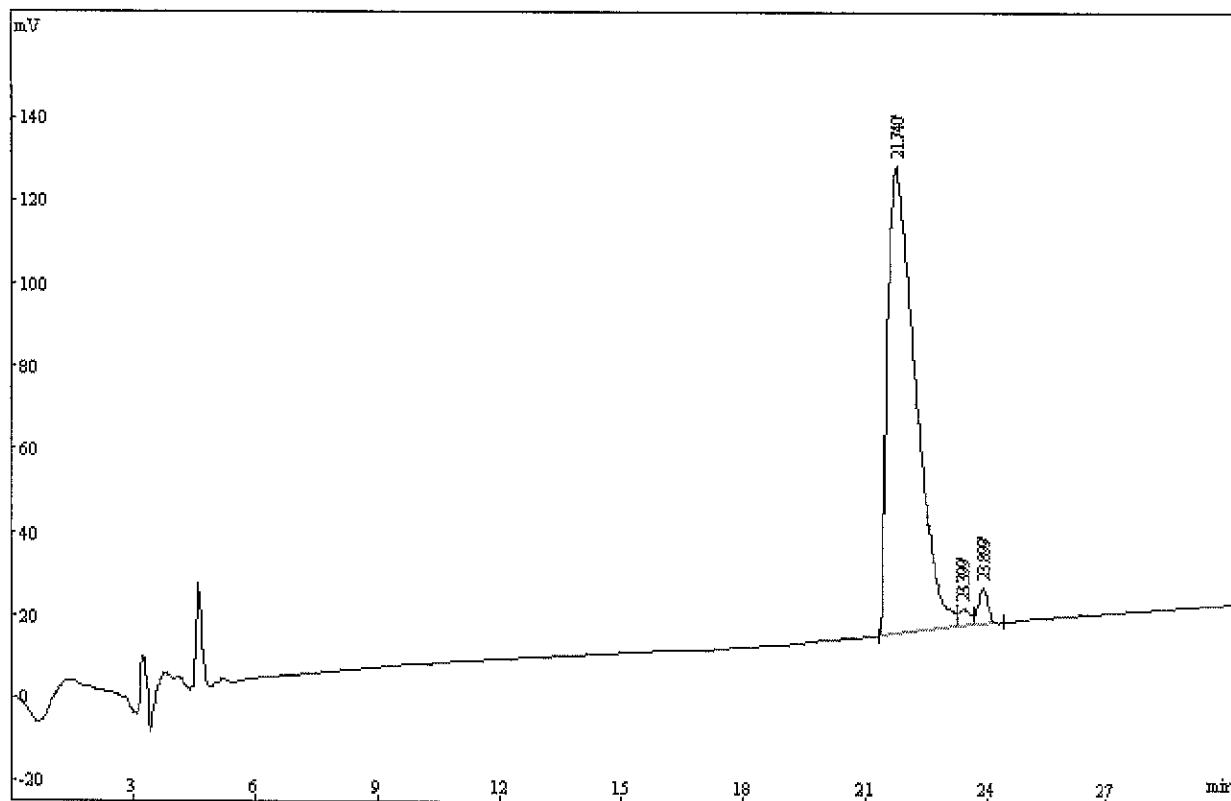

| No.   | RT     | Area% | Area    |
|-------|--------|-------|---------|
| 1     | 21.740 | 95.77 | 5412808 |
| 2     | 23.399 | 1.516 | 85673   |
| 3     | 23.899 | 2.712 | 153262  |
| Total |        | 100   | 5651743 |

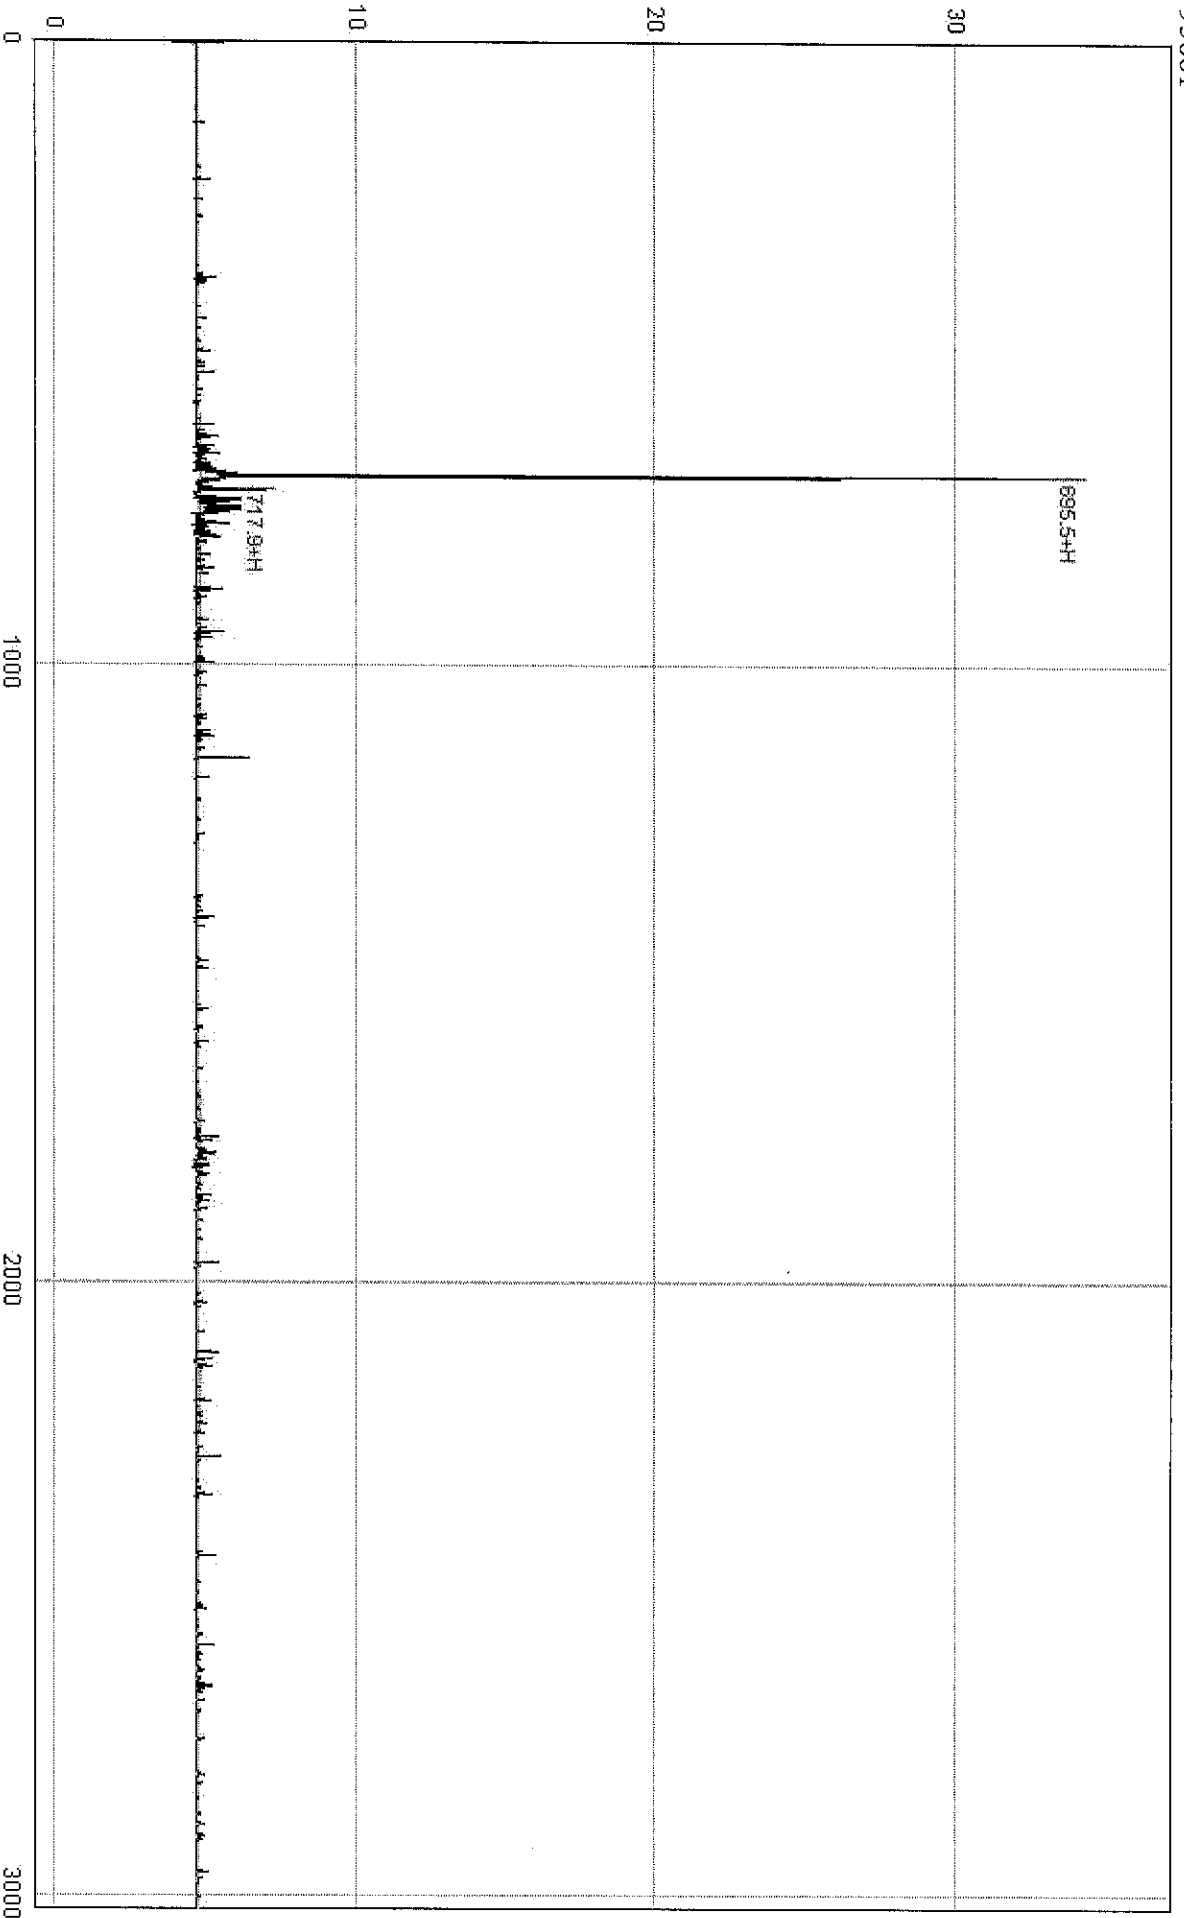

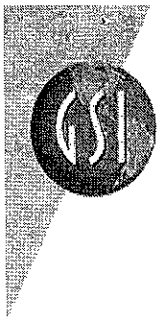

Genemed Synthesis, Inc.  
6203 Wood Lake Center Dr., Bldg. 2, San Antonio, TX 78244, USA  
Toll free (800) 344-5337; Phone: (210) 745-5988; Fax (210) 745-5992  
Email: [info@genemedsyn.com](mailto:info@genemedsyn.com), Website: [www.genemedsyn.com](http://www.genemedsyn.com)

PEPTIDE DATA SHEET

LOT NO: 95882

NAME: G715

SEQUENCE: Myr-LLK-amide *not soluble*

EXPECTED MASS: 581.5 ± 1.0

AVERAGE MASS: 581.4

SOULUBILITY: Not tested

AMOUNT DELIVERED: 19mg

PURITY: 96.77%

COMMENTS: white to off-white powder or lumps

DATE: 07/28/2014

VERIFIED BY: Zhang Z.Y.

# Customer Peptide HPLC Report

Sample name: 95882

Analyzed: 07/25/14 15:53 Vial Number: 95882

Reported: 07/28/14 13:36 Volume: 20.0ul

Column Type: 250\*4.6mm Kromasil C4 5u

Solvent A: 0.1%TFA acetonitrile

Solvent B: 0.1%TFA Water

Method: Gradient A:B, t=0.0mins 10:90 t=30.0mins 100:0

Wavelength: 220nm

Data Path: D:\HPLC\custom peptide\GS\95882\95882.hw

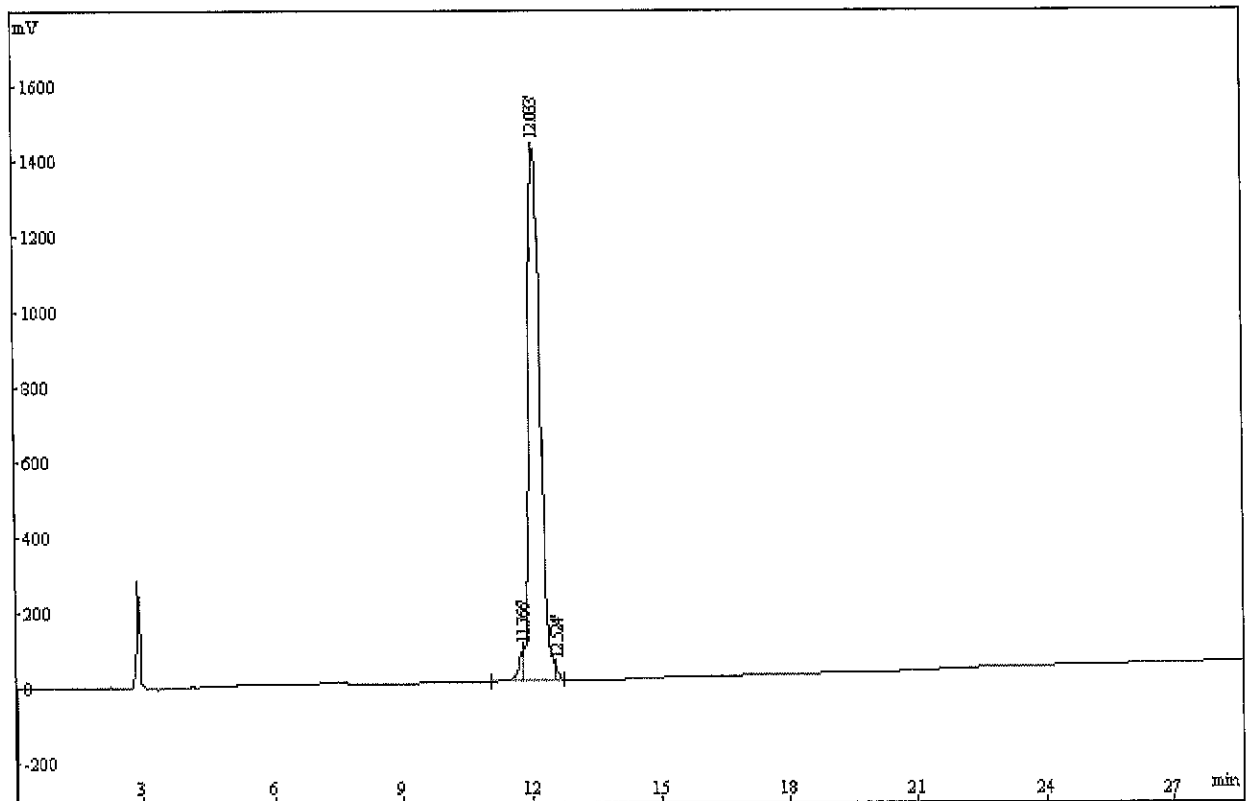

| No.   | RT     | Area%  | Area     |
|-------|--------|--------|----------|
| 1     | 11.766 | 2.648  | 735123   |
| 2     | 12.033 | 96.77  | 26862848 |
| 3     | 12.524 | 0.5836 | 162008   |
| Total |        | 100    | 27759979 |

95882

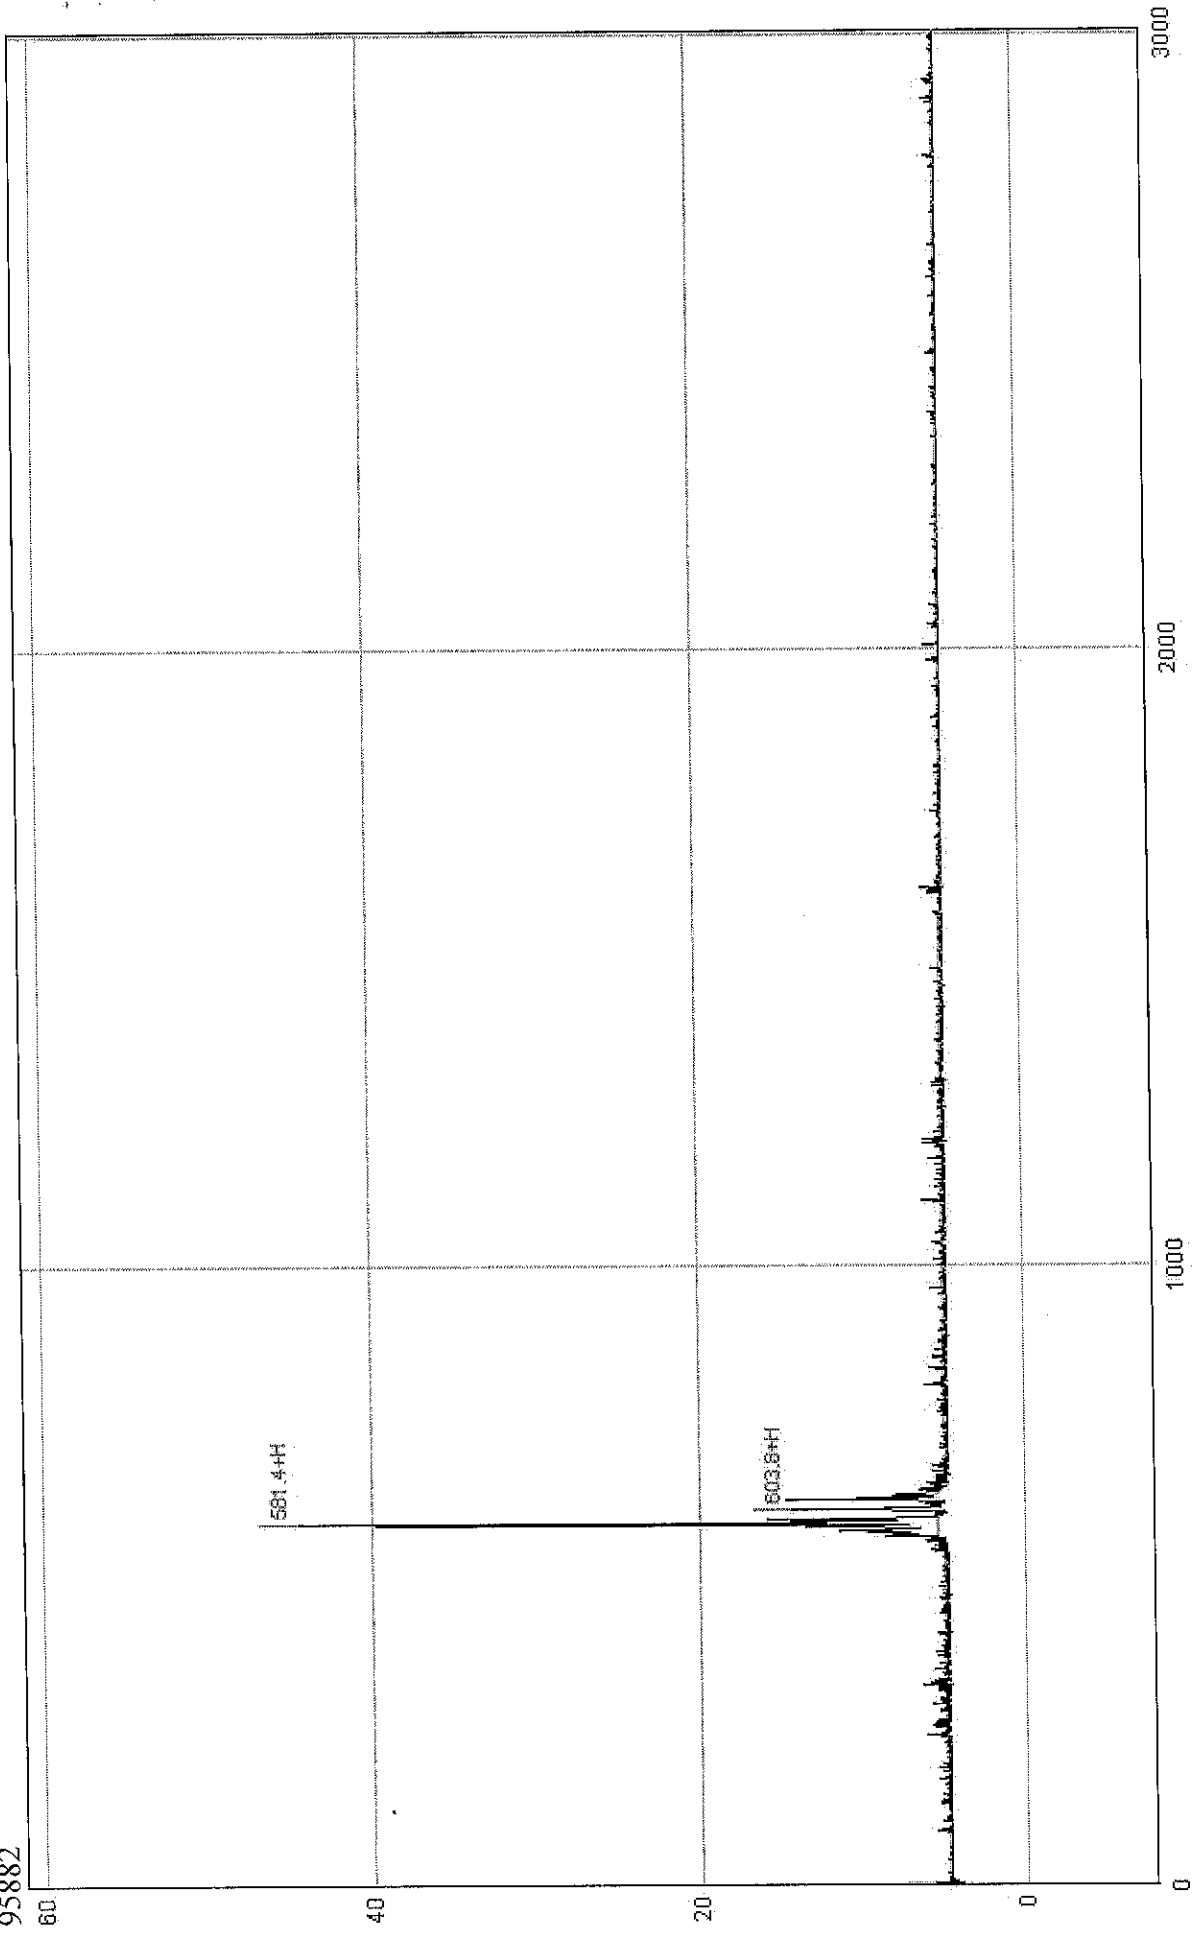

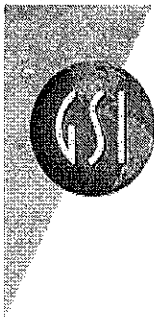

Genemed Synthesis, Inc.  
6203 Wood Lake Center Dr., Bldg. 2, San Antonio, TX 78244, USA  
Toll free (800) 344-5337; Phone: (210) 745-5988; Fax (210) 745-5992  
Email: [info@genemedsyn.com](mailto:info@genemedsyn.com), Website: [www.genemedsyn.com](http://www.genemedsyn.com)

PEPTIDE DATA SHEET

LOT NO: 95872

NAME: G705

SEQUENCE: Myr-EE-amide

EXPECTED MASS:  $485.2 \pm 1.0$

AVERAGE MASS: 485.5

SOULUBILITY: Not tested

AMOUNT DELIVERED: 19mg

PURITY: 96.30%

COMMENTS: white to off-white powder or lumps

DATE: 07/23/2014

VERIFIED BY: Zhang Z.Q

# Customer Peptide HPLC Report

Sample name: 95872

Analyzed:07/21/14 14:24 Vial Number: 95872

Reported:07/23/14 13:11 Volume:20.0ul

Column Type: 250\*4.6mm Kromasil C4 5u

Solvent A:0.1%TFA acetonitrile

Solvent B:0.1%TFA Water

Method: Gradient A:B, t=0.0mins 10:90 t=30.0mins 100:0

Wavelength: 220nm

Data Path: D:\HPLC\custom peptide\GS\95872\95872.hw:

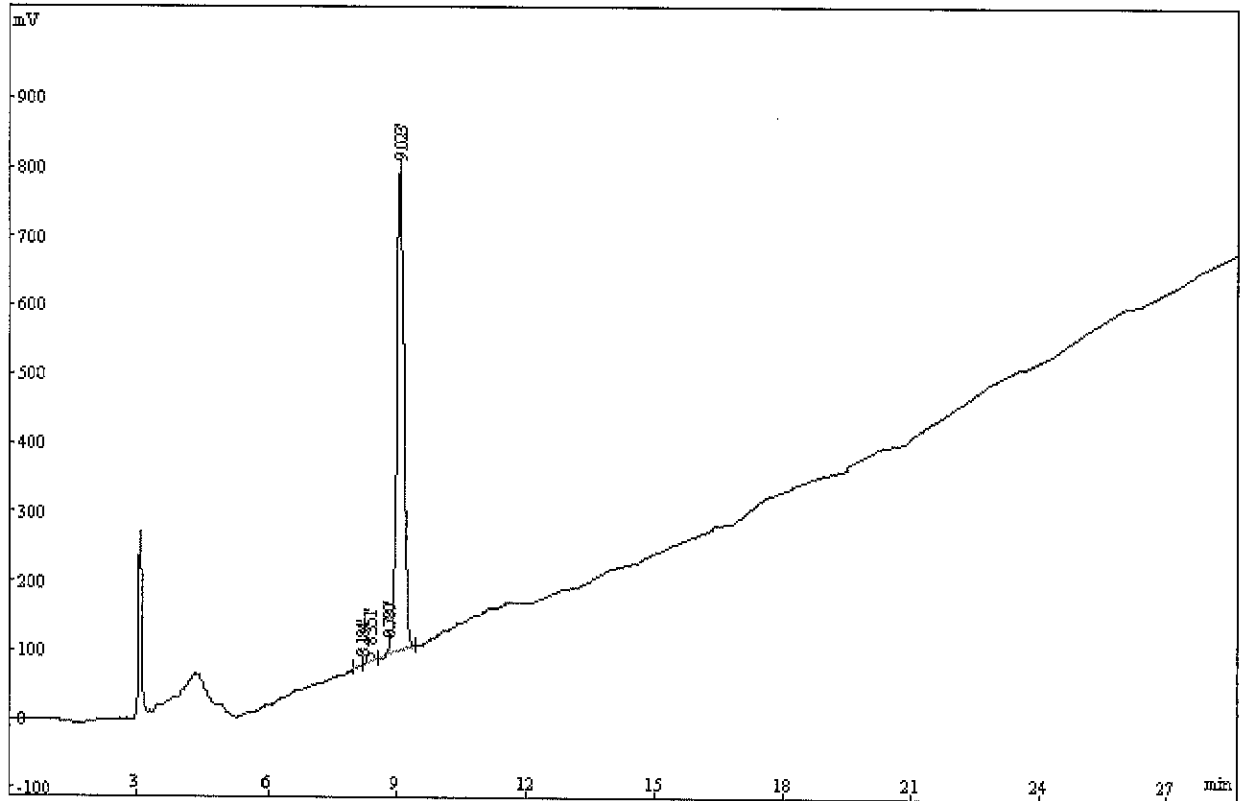

| No.   | RT    | Area%  | Area    |
|-------|-------|--------|---------|
| 1     | 8.184 | 0.2637 | 22337   |
| 2     | 8.351 | 2.156  | 182625  |
| 3     | 8.780 | 1.282  | 108588  |
| 4     | 9.023 | 96.3   | 8155470 |
| Total |       | 100    | 8469020 |



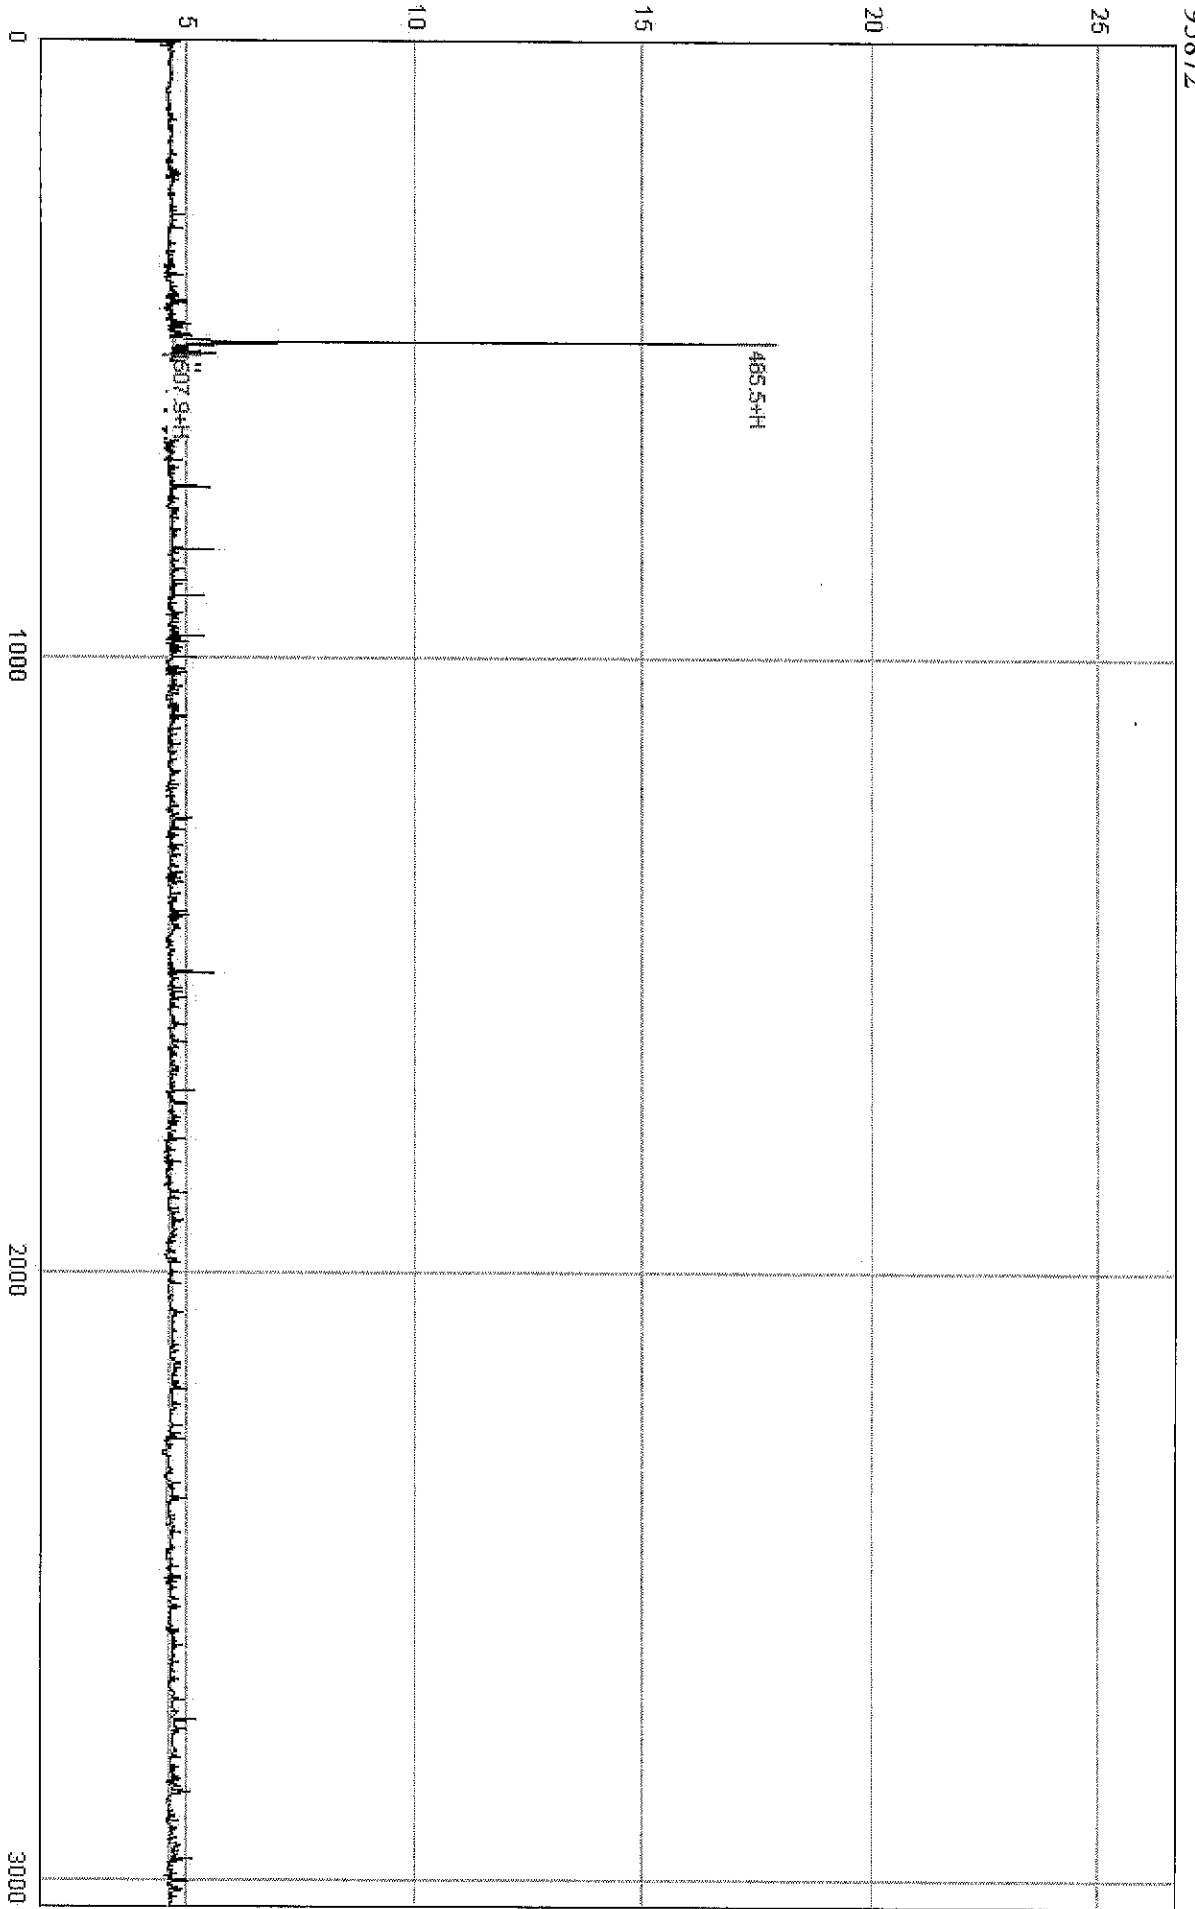

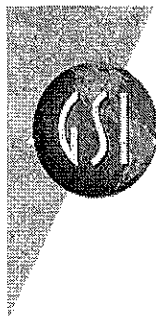

Genemed Synthesis, Inc.

6203 Wood Lake Center Dr., Bldg. 2, San Antonio, TX 78244, USA  
Toll free (800) 344-5337; Phone: (210) 745-5988; Fax (210) 745-5992  
Email: [info@genemedsyn.com](mailto:info@genemedsyn.com), Website: [www.genemedsyn.com](http://www.genemedsyn.com)

PEPTIDE DATA SHEET

LOT NO: 95873

NAME: G706

SEQUENCE: Myr-LE-amide

EXPECTED MASS:  $469.3 \pm 1.0$

AVERAGE MASS: 469.4

SOULUBILITY: Not tested

AMOUNT DELIVERED: 19mg

PURITY: 96.27%

COMMENTS: white to off-white powder or lumps

DATE: 07/23/2014

VERIFIED BY: Zhang Z-Q

# Customer Peptide HPLC Report

Sample name: 95873

Analyzed: 07/21/14 17:36 Vail Number: 95873

Reported: 07/23/14 10:04 Volume: 20.0ul

Column Type: 250\*4.6mm Kromasil C18 5u

Solvent A: 0.1%TFA acetonitrile

Solvent B: 0.1%TFA Water

Method: Gradient A:B, t=0.0mins 30:70 t=25.0mins 100:0

Wavelength: 220nm

Data Path: D:\HPLC\custom peptide\GS\95873\95873.hw:

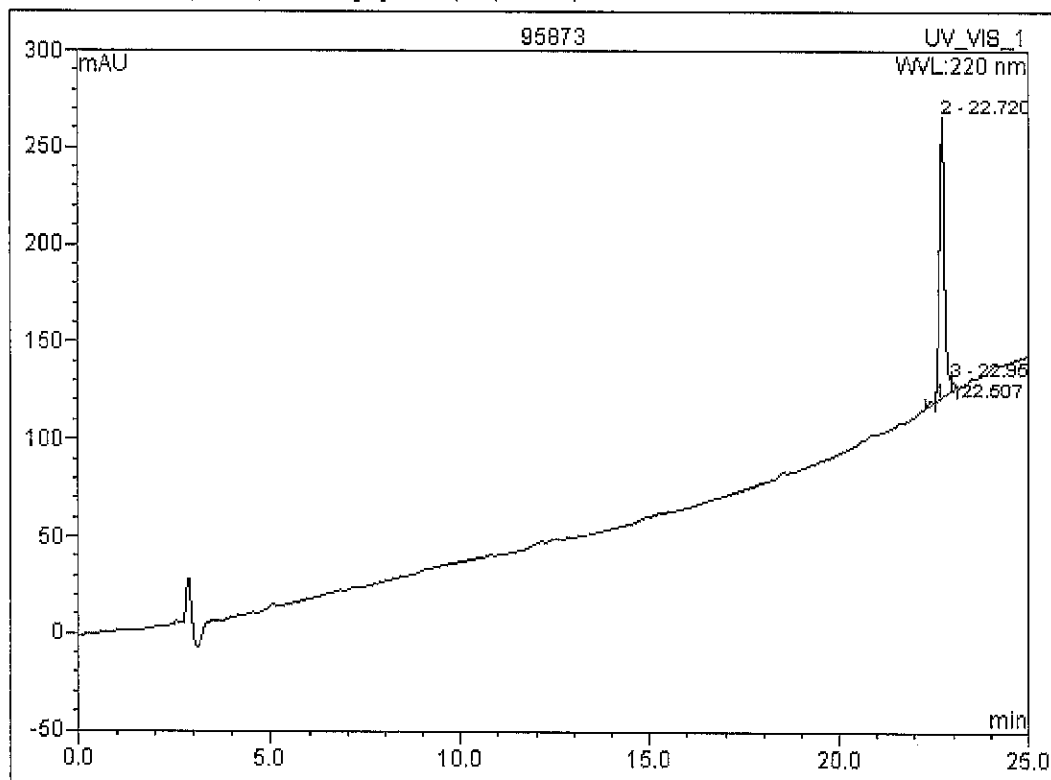

| No.           | Ret.Time<br>min | Height<br>mAU | Area<br>mAU*min | Rel.Area<br>% |
|---------------|-----------------|---------------|-----------------|---------------|
| 1             | 22.51           | 0.707         | 0.293           | 1.26          |
| 2             | 22.72           | 143.953       | 22.467          | 96.27         |
| 3             | 22.95           | 5.777         | 0.576           | 2.47          |
| <b>Total:</b> |                 |               | 23.336          | 100.000       |

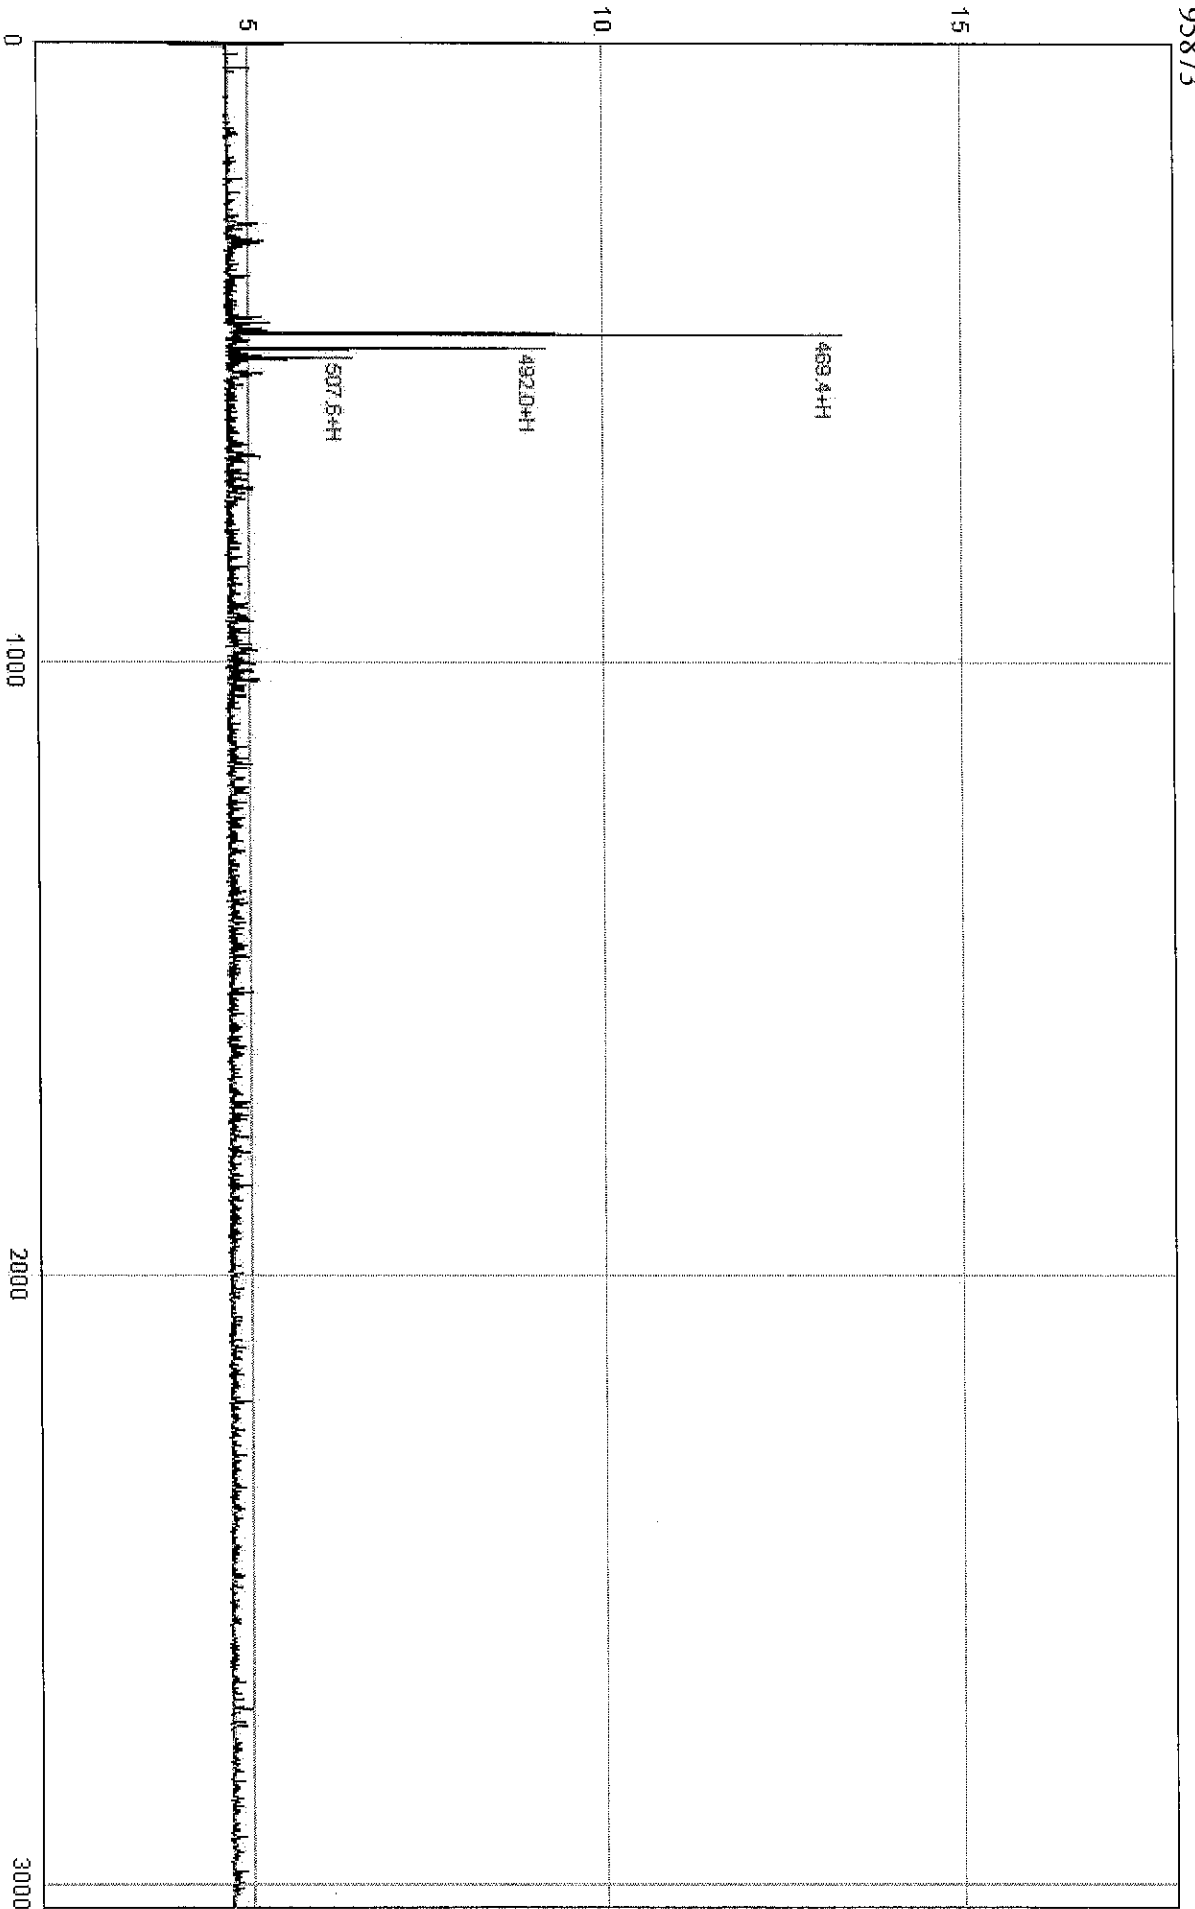

Genemed Synthesis, Inc.

6203 Wood Lake Center Dr., Bldg. 2, San Antonio, TX 78244, USA  
Toll free (800) 344-5337; Phone: (210) 745-5988; Fax (210) 745-5992  
Email: [info@genemedsyn.com](mailto:info@genemedsyn.com), Website: [www.genemedsyn.com](http://www.genemedsyn.com)

PEPTIDE DATA SHEET

LOT NO: 95874

NAME: G707

SEQUENCE: Myr-WE-amide

EXPECTED MASS:  $542.3 \pm 1.0$

AVERAGE MASS: 542.3

SOULUBILITY: Not tested

AMOUNT DELIVERED: 19mg

PURITY: 96.81%

COMMENTS: yellow powder or lumps

DATE: 07/23/2014

VERIFIED BY: Zhang Z.G

# Customer Peptide HPLC Report

Sample name: 95874

Analyzed:07/21/14 17:30 Vail Number: 95874

Reported:07/23/14 13:13 Volume:20.0ul

Column Type: 250\*4.6mm Kromasil C18 5u

Solvent A:0.1%TFA acetonitrile

Solvent B:0.1%TFA Water

Method: Gradient A:B, t=0.0mins 05:95 t=30.0mins 100:0

Wavelength: 220nm

Data Path: D:\HPLC\custom peptide\GS\95874\95874.hw:

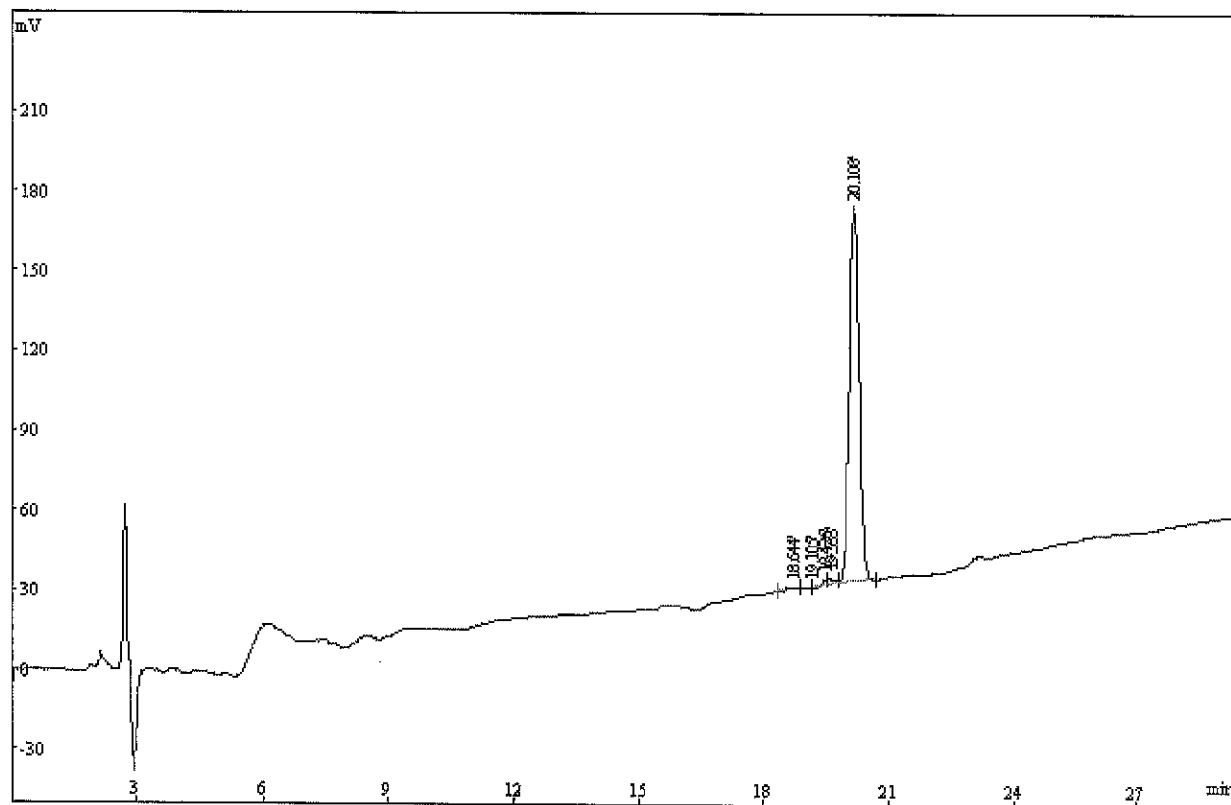

| No.   | RT     | Area%   | Area    |
|-------|--------|---------|---------|
| 1     | 18.644 | 0.7883  | 19939   |
| 2     | 19.105 | 0.05414 | 1369    |
| 3     | 19.426 | 0.8967  | 22680   |
| 4     | 19.533 | 1.45    | 36675   |
| 5     | 20.108 | 96.81   | 2448707 |
| Total |        | 100     | 2529370 |

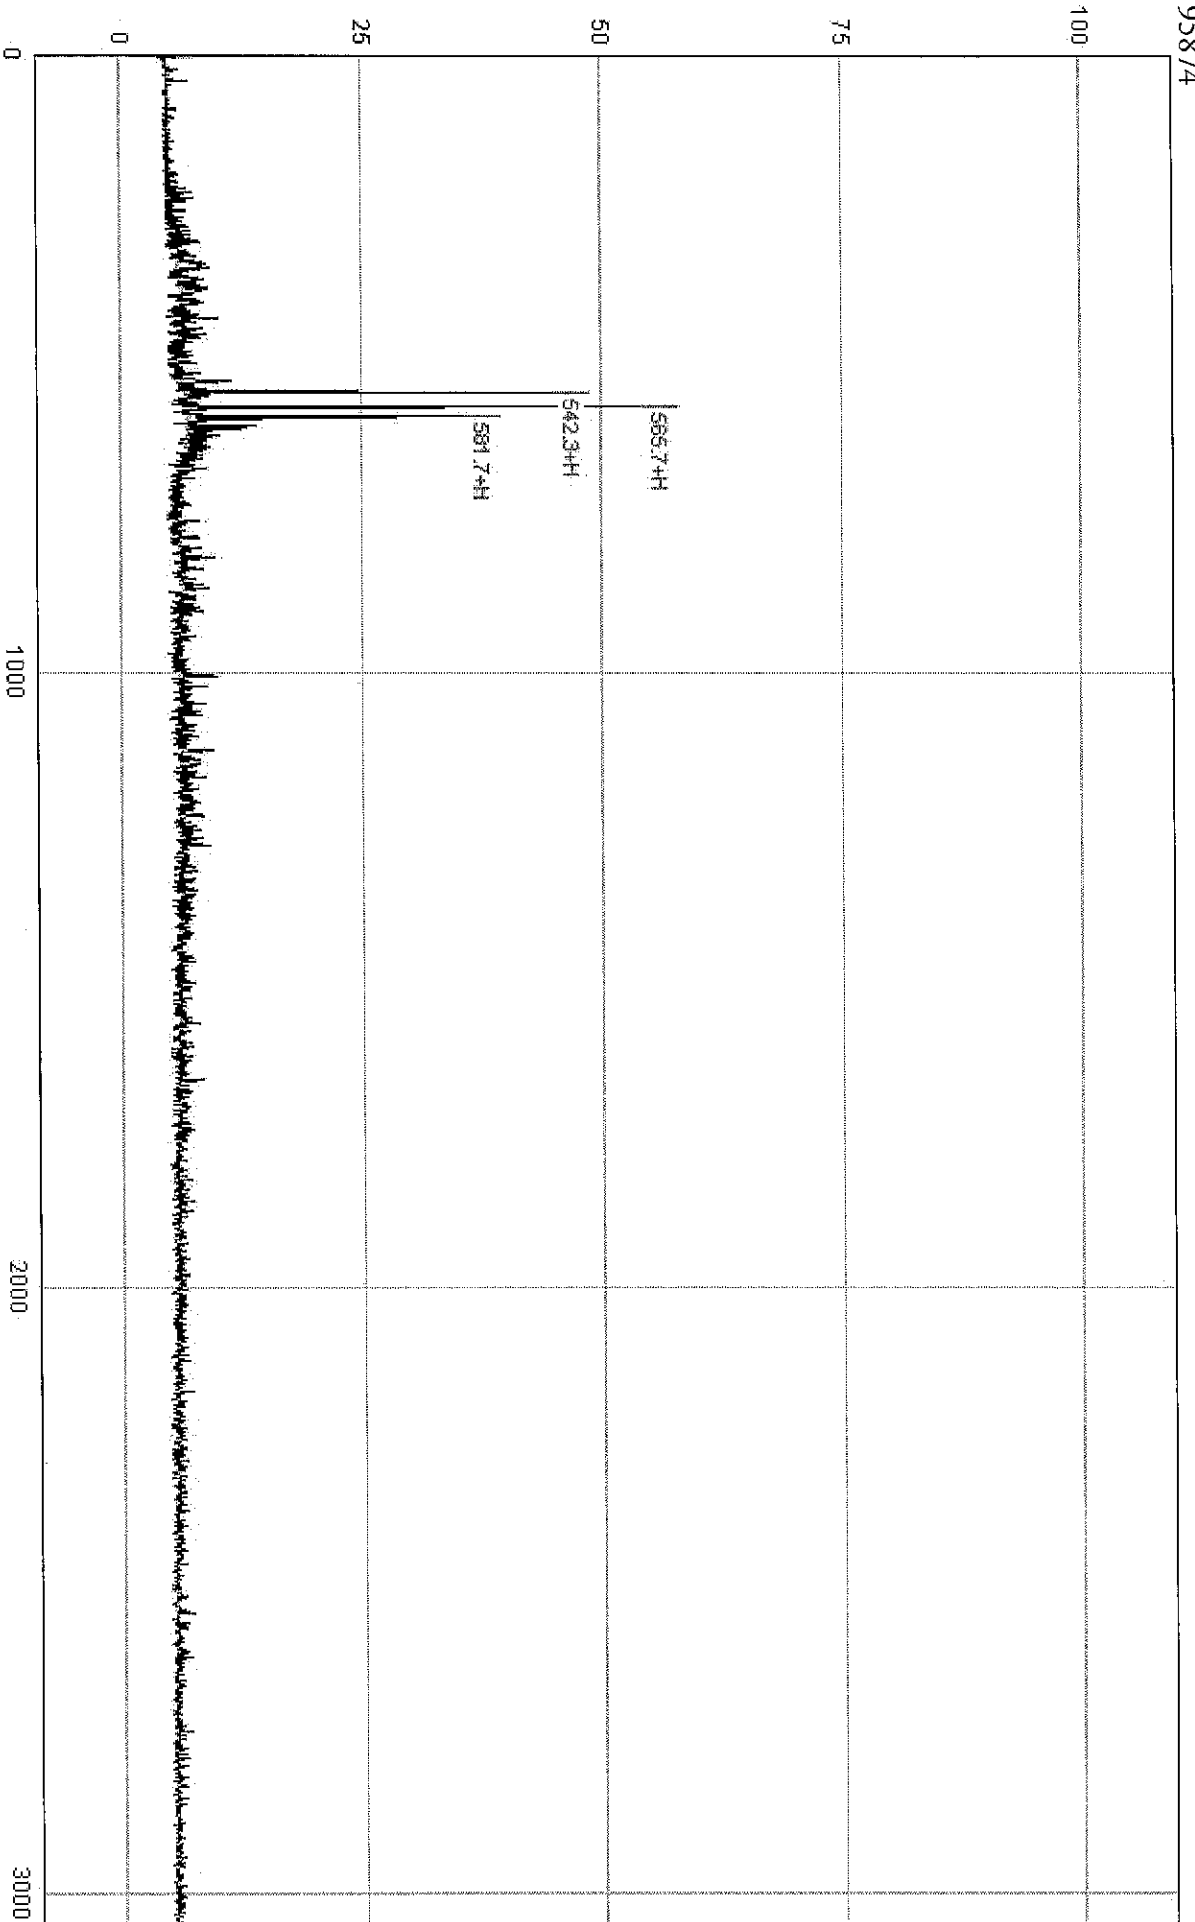

Genemed Synthesis, Inc.

6203 Wood Lake Center Dr., Bldg. 2, San Antonio, TX 78244, USA  
Toll free (800) 344-5337; Phone: (210) 745-5988; Fax (210) 745-5992  
Email: [info@genemedsyn.com](mailto:info@genemedsyn.com), Website: [www.genemedsyn.com](http://www.genemedsyn.com)

PEPTIDE DATA SHEET

LOT NO: 95875

NAME: G708

SEQUENCE: Myr-EW-amide

EXPECTED MASS:  $542.3 \pm 1.0$

AVERAGE MASS: 542.4

SOULUBILITY: Not tested

AMOUNT DELIVERED: 19mg

PURITY: 95.85%

COMMENTS: white to off-white powder or lumps

DATE: 07/23/2014

VERIFIED BY: Zhang .z.g



# Customer Peptide HPLC Report

Sample name: 95875

Analyzed: 07/21/14 16:25 Vial Number: 95875

Reported: 07/23/14 10:06 Volume: 20.0ul

Column Type: 250\*4.6mm Kromasil C18 5u

Solvent A: 0.1%TFA acetonitrile

Solvent B: 0.1%TFA Water

Method: Gradient A:B, t=0.0mins 30:70 t=25.0mins 100:0

Wavelength: 220nm

Data Path: D:\HPLC\custom peptide\GS\95875\95875.hw:

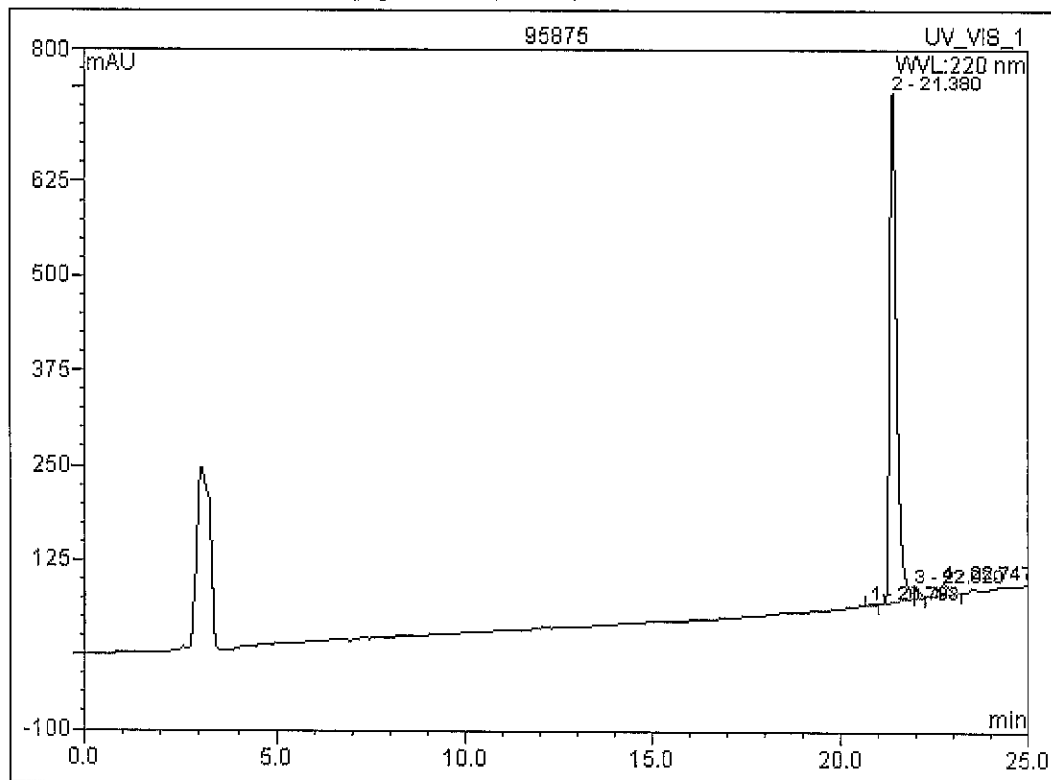

| No.           | Ret.Time<br>min | Height<br>mAU | Area<br>mAU*min | Rel.Area<br>% |
|---------------|-----------------|---------------|-----------------|---------------|
| 1             | 20.79           | 1.956         | 0.314           | 0.21          |
| 2             | 21.38           | 671.885       | 142.897         | 95.85         |
| 3             | 22.02           | 13.916        | 2.058           | 1.38          |
| 4             | 22.75           | 15.713        | 3.810           | 2.56          |
| <b>Total:</b> |                 |               | 149.078         | 100.000       |

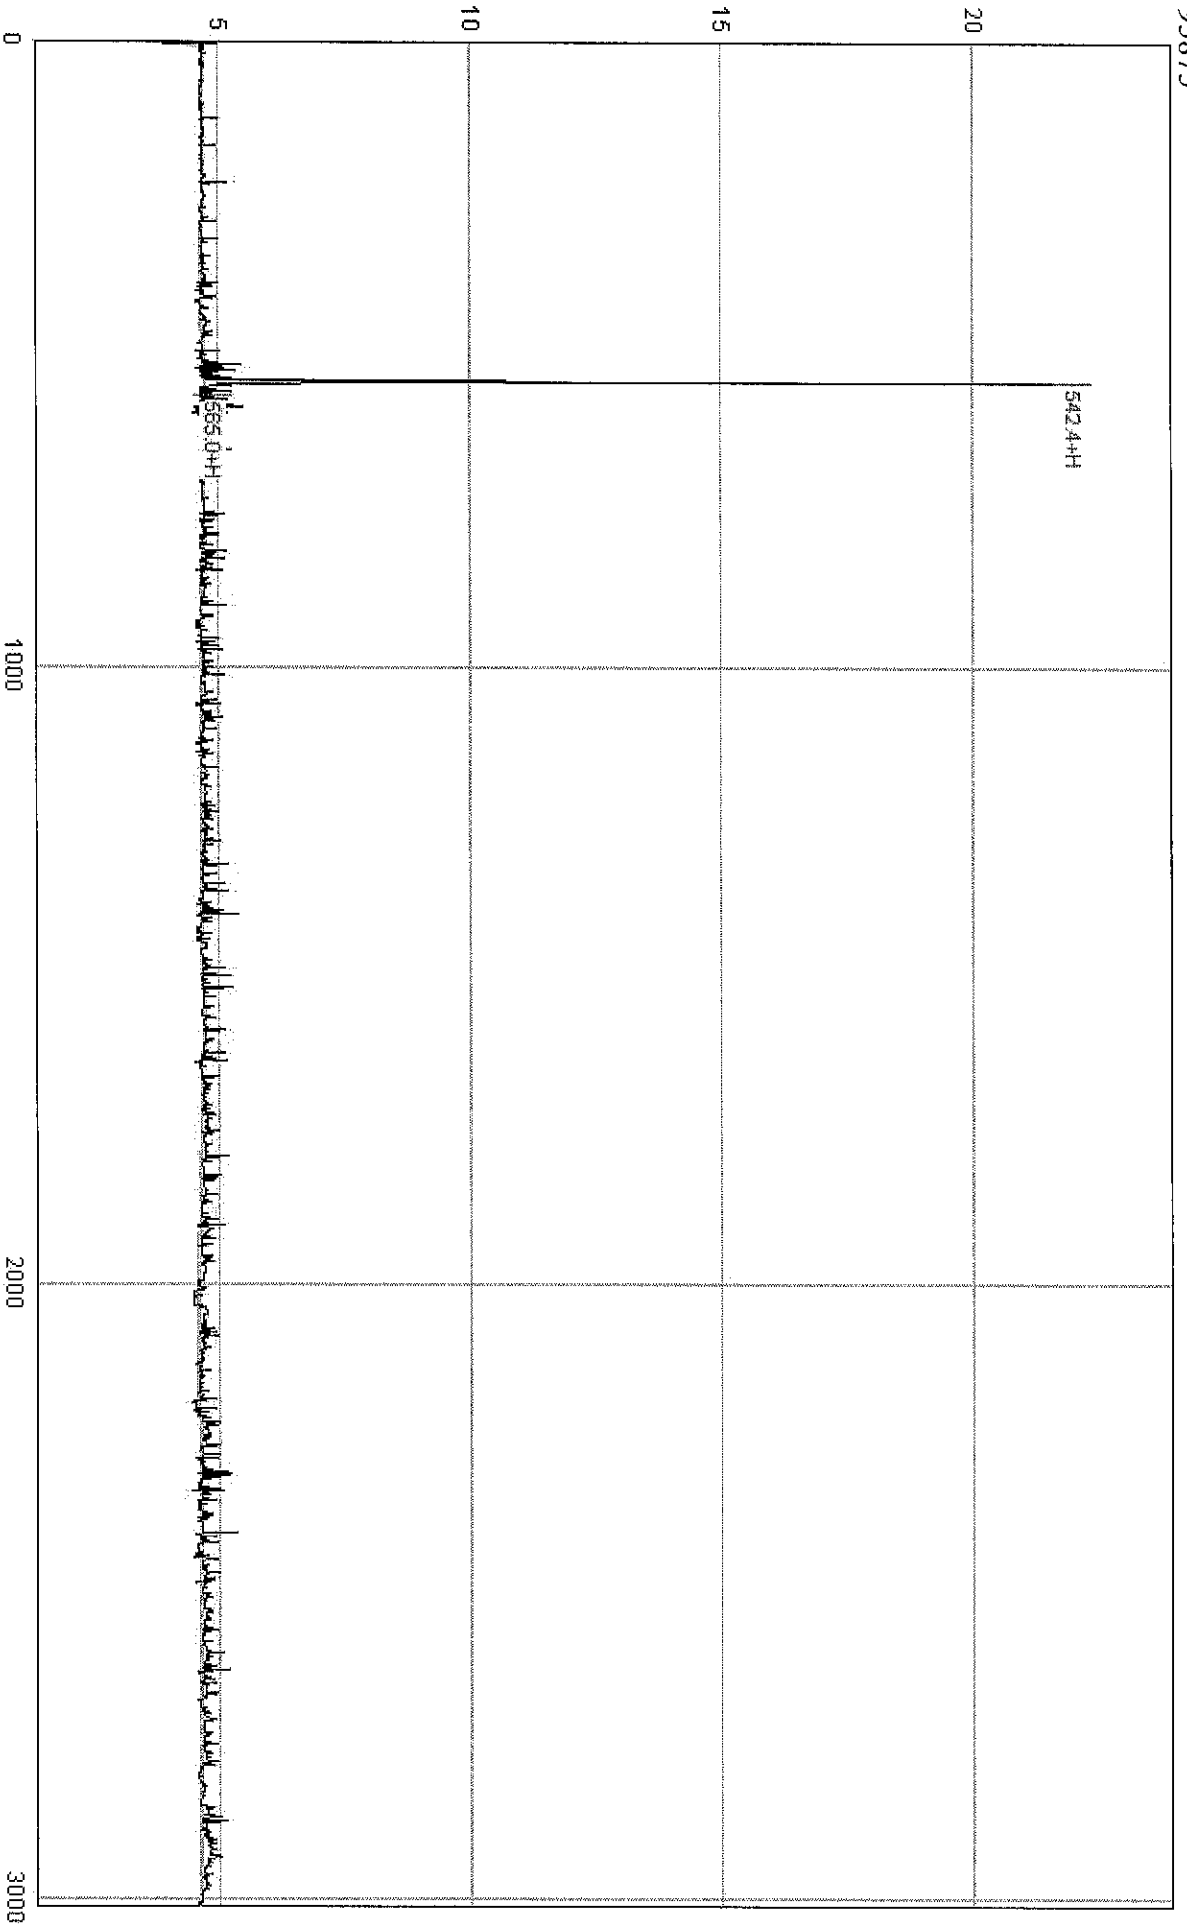

Supplement: NIHMS707187-supplement-Supplementary_Information.pdf [file NIHMS707187-supplement-Supplementary_Information.pdf]
